# Supplementary material for: Whole genome sequence analysis of multi drug resistant community associated methicillin resistant Staphylococcus aureus from food fish: detection of clonal lineage ST 28 and its antimicrobial resistance and virulence genes
Source: PeerJ. 2021 May 24;9:e11224. doi: 10.7717/peerj.11224 (PMC8158172; doi:10.7717/peerj.11224)
Supplement: Supplemental Information 3 [file peerj-09-11224-s003.xls]

## Sheet: Biological Processes
GO_Id	GO_Term	Number of ORF
GO:0006351	transcription, DNA-templated [GO:0006351]	54
GO:0009405	pathogenesis [GO:0009405]	41
GO:0006412	translation [GO:0006412]	38
GO:0006355	regulation of transcription, DNA-templated [GO:0006355]	33
GO:0006810	transport [GO:0006810]	16
GO:0055085	transmembrane transport [GO:0055085]	14
GO:0000160	phosphorelay signal transduction system [GO:0000160]	12
GO:0008360	regulation of cell shape [GO:0008360]	9
GO:0006979	response to oxidative stress [GO:0006979]	8
GO:0009401	protein-N(PI)-phosphohistidine-sugar phosphotransferase activity [GO:0008982]	7
GO:0009401	kinase activity [GO:0016301]	5
GO:0006260	DNA-directed DNA polymerase activity [GO:0003887]	5
GO:0006457	protein folding [GO:0006457]	5
GO:0006096	glycolytic process [GO:0006096]	5
GO:0009252	peptidoglycan biosynthetic process [GO:0009252]	5
GO:0051715	extracellular region [GO:0005576]	5
GO:0006281	DNA recombination [GO:0006310]	5
GO:0015833	peptide transport [GO:0015833]	5
GO:0015940	pantothenate biosynthetic process [GO:0015940]	5
GO:0006950	response to stress [GO:0006950]	4
GO:0006777	Mo-molybdopterin cofactor biosynthetic process [GO:0006777]	4
GO:0009249	protein lipoylation [GO:0009249]	4
GO:0006310	DNA recombination [GO:0006310]	4
GO:0051301	cell cycle [GO:0007049]	4
GO:0051301	cell division [GO:0051301]	4
GO:0006633	fatty acid biosynthetic process [GO:0006633]	4
GO:0009058	pyridoxal phosphate binding [GO:0030170]	4
GO:0006189	cytoplasm [GO:0005737]	4
GO:0046685	response to arsenic-containing substance [GO:0046685]	4
GO:0001522	pseudouridine synthesis [GO:0001522]	4
GO:0071555	cell division [GO:0051301]	4
GO:0009234	menaquinone biosynthetic process [GO:0009234]	3
GO:0071555	cell wall organization [GO:0071555]	3
GO:0006782	protoporphyrinogen IX biosynthetic process [GO:0006782]	3
GO:0006662	cell redox homeostasis [GO:0045454]	3
GO:0006099	tricarboxylic acid cycle [GO:0006099]	3
GO:0005975	carbohydrate metabolic process [GO:0005975]	3
GO:0006071	glycerone kinase activity [GO:0004371]	3
GO:0045454	protein disulfide oxidoreductase activity [GO:0015035]	3
GO:0006281	DNA repair [GO:0006281]	3
GO:0009432	DNA repair [GO:0006281]	3
GO:0006094	gluconeogenesis [GO:0006094]	3
GO:0015074	nucleic acid binding [GO:0003676]	3
GO:0000271	polysaccharide biosynthetic process [GO:0000271]	3
GO:0005975	transcription factor activity, sequence-specific DNA binding [GO:0003700]	3
GO:0009252	cell wall organization [GO:0071555]	3
GO:0015700	plasma membrane [GO:0005886]	3
GO:0006352	sigma factor activity [GO:0016987]	3
GO:0006364	rRNA processing [GO:0006364]	3
GO:0009166	nucleotide catabolic process [GO:0009166]	3
GO:0006629	lipid metabolic process [GO:0006629]	3
GO:0006281	damaged DNA binding [GO:0003684]	3
GO:0008360	peptidoglycan biosynthetic process [GO:0009252]	3
GO:0007049	cell cycle [GO:0007049]	3
GO:0006310	DNA binding [GO:0003677]	3
GO:0006310	nucleic acid binding [GO:0003676]	3
GO:0030420	integral component of membrane [GO:0016021]	3
GO:0009252	regulation of cell shape [GO:0008360]	3
GO:0030091	protein repair [GO:0030091]	3
GO:0009423	aromatic amino acid family biosynthetic process [GO:0009073]	3
GO:0006605	protein targeting [GO:0006605]	3
GO:0006313	transposition, DNA-mediated [GO:0006313]	2
GO:0019512	lactose catabolic process via tagatose-6-phosphate [GO:0019512]	2
GO:0042819	vitamin B6 biosynthetic process [GO:0042819]	2
GO:0006163	purine nucleotide metabolic process [GO:0006163]	2
GO:0009094	amino acid binding [GO:0016597]	2
GO:0009236	cobalamin biosynthetic process [GO:0009236]	2
GO:0015991	proton-transporting ATP synthase complex, catalytic core F(1) [GO:0045261]	2
GO:0005975	cytoplasm [GO:0005737]	2
GO:0006289	SOS response [GO:0009432]	2
GO:0008033	tRNA processing [GO:0008033]	2
GO:0070395	lipoteichoic acid biosynthetic process [GO:0070395]	2
GO:0009401	plasma membrane [GO:0005886]	2
GO:0042167	heme oxygenase (decyclizing) activity [GO:0004392]	2
GO:0045892	negative regulation of transcription, DNA-templated [GO:0045892]	2
GO:0006432	tRNA binding [GO:0000049]	2
GO:0046654	tetrahydrofolate biosynthetic process [GO:0046654]	2
GO:0007059	chromosome segregation [GO:0007059]	2
GO:0030261	chromosome condensation [GO:0030261]	2
GO:0016114	terpenoid biosynthetic process [GO:0016114]	2
GO:0019288	isopentenyl diphosphate biosynthetic process, methylerythritol 4-phosphate pathway [GO:0019288]	2
GO:0006298	mismatched DNA binding [GO:0030983]	2
GO:0006541	transferase activity [GO:0016740]	2
GO:0071555	cell cycle [GO:0007049]	2
GO:0006396	RNA processing [GO:0006396]	2
GO:0009245	lipid A biosynthetic process [GO:0009245]	2
GO:0008360	UDP-N-acetylgalactosamine biosynthetic process [GO:0019277]	2
GO:0042128	nitrite reductase [NAD(P)H] activity [GO:0008942]	2
GO:0008299	isoprenoid biosynthetic process [GO:0008299]	2
GO:0009098	leucine biosynthetic process [GO:0009098]	2
GO:0009231	zinc ion binding [GO:0008270]	2
GO:0015074	DNA integration [GO:0015074]	2
GO:0055085	transporter activity [GO:0005215]	2
GO:0019277	cytoplasm [GO:0005737]	2
GO:0017038	protein import [GO:0017038]	2
GO:0012501	programmed cell death [GO:0012501]	2
GO:0035999	tetrahydrofolate interconversion [GO:0035999]	2
GO:0015937	ATP binding [GO:0005524]	2
GO:0009113	purine nucleobase biosynthetic process [GO:0009113]	2
GO:0006047	UDP-N-acetylglucosamine metabolic process [GO:0006047]	2
GO:0006525	metal ion binding [GO:0046872]	2
GO:0015031	protein transport [GO:0015031]	2
GO:0006284	base-excision repair [GO:0006284]	2
GO:0009401	phosphoenolpyruvate-dependent sugar phosphotransferase system [GO:0009401]	2
GO:0071555	integral component of membrane [GO:0016021]	2
GO:0042853	alanine dehydrogenase activity [GO:0000286]	2
GO:2001059	tagatose-6-phosphate kinase activity [GO:0009024]	2
GO:0000162	tryptophan biosynthetic process [GO:0000162]	2
GO:0006260	DNA repair [GO:0006281]	2
GO:0009097	isoleucine biosynthetic process [GO:0009097]	2
GO:0019835	integral component of membrane [GO:0016021]	2
GO:0006281	DNA binding [GO:0003677]	2
GO:0042026	protein refolding [GO:0042026]	2
GO:0006782	pyridoxal phosphate binding [GO:0030170]	2
GO:0019290	siderophore transmembrane transporter activity [GO:0015343]	2
GO:0009103	lipopolysaccharide biosynthetic process [GO:0009103]	2
GO:0030001	metal ion transport [GO:0030001]	2
GO:0006807	nitrogen compound metabolic process [GO:0006807]	2
GO:0005975	mannose-6-phosphate isomerase activity [GO:0004476]	2
GO:0031119	tRNA pseudouridine synthesis [GO:0031119]	2
GO:0055085	sodium ion transport [GO:0006814]	2
GO:0006098	carbohydrate metabolic process [GO:0005975]	2
GO:0009253	peptidoglycan catabolic process [GO:0009253]	2
GO:0006400	tRNA modification [GO:0006400]	2
GO:0033212	monooxygenase activity [GO:0004497]	2
GO:0042777	proton-transporting ATP synthase activity, rotational mechanism [GO:0046933]	2
GO:0042773	integral component of membrane [GO:0016021]	2
GO:0006260	single-stranded DNA binding [GO:0003697]	2
GO:0006541	glutamine metabolic process [GO:0006541]	2
GO:0006814	transporter activity [GO:0005215]	2
GO:0000917	barrier septum assembly [GO:0000917]	2
GO:0009088	threonine biosynthetic process [GO:0009088]	2
GO:0042777	proton-transporting ATP synthase complex, coupling factor F(o) [GO:0045263]	2
GO:0030632	alanine racemase activity [GO:0008784]	2
GO:0006260	ATP binding [GO:0005524]	2
GO:0009306	protein secretion [GO:0009306]	2
GO:0006865	integral component of membrane [GO:0016021]	2
GO:0006633	transferase activity [GO:0016740]	2
GO:0006189	ATP binding [GO:0005524]	2
GO:0006284	hydrolase activity, acting on glycosyl bonds [GO:0016798]	1
GO:0006281	ATP binding [GO:0005524]	1
GO:0006541	phosphoribosylformylglycinamidine synthase activity [GO:0004642]	1
GO:0015991	integral component of membrane [GO:0016021]	1
GO:0009294	DNA mediated transformation [GO:0009294]	1
GO:0006629	phosphatidylinositol diacylglycerol-lyase activity [GO:0004436]	1
GO:0042126	molybdenum ion binding [GO:0030151]	1
GO:0006525	carbamate kinase activity [GO:0008804]	1
GO:0009073	chorismate mutase activity [GO:0004106]	1
GO:0008616	zinc ion binding [GO:0008270]	1
GO:0046080	hydrolase activity [GO:0016787]	1
GO:0005975	hydrolase activity, acting on carbon-nitrogen (but not peptide) bonds [GO:0016810]	1
GO:0071555	UDP-N-acetylglucosamine diphosphorylase activity [GO:0003977]	1
GO:0006353	DNA-templated transcription, termination [GO:0006353]	1
GO:0009432	DNA replication [GO:0006260]	1
GO:0030420	establishment of competence for transformation [GO:0030420]	1
GO:0006543	pyridoxal 5'-phosphate synthase (glutamine hydrolysing) activity [GO:0036381]	1
GO:0044205	orotidine-5'-phosphate decarboxylase activity [GO:0004590]	1
GO:0065002	P-P-bond-hydrolysis-driven protein transmembrane transporter activity [GO:0015450]	1
GO:0006351	regulation of DNA-templated transcription, elongation [GO:0032784]	1
GO:0006396	endoribonuclease activity [GO:0004521]	1
GO:0006183	metal ion binding [GO:0046872]	1
GO:0019547	cytoplasm [GO:0005737]	1
GO:0015777	teichoic-acid-transporting ATPase activity [GO:0015438]	1
GO:0006541	cobalamin biosynthetic process [GO:0009236]	1
GO:0031388	organic acid phosphorylation [GO:0031388]	1
GO:0006220	pyrimidine nucleotide metabolic process [GO:0006220]	1
GO:0046294	formaldehyde catabolic process [GO:0046294]	1
GO:0009234	methyltransferase activity [GO:0008168]	1
GO:0046474	magnesium ion binding [GO:0000287]	1
GO:0019632	shikimate metabolic process [GO:0019632]	1
GO:0030001	metal ion binding [GO:0046872]	1
GO:0019556	histidine catabolic process to glutamate and formamide [GO:0019556]	1
GO:0042777	ATP binding [GO:0005524]	1
GO:0009164	nucleoside catabolic process [GO:0009164]	1
GO:0006281	methylated-DNA-[protein]-cysteine S-methyltransferase activity [GO:0003908]	1
GO:0000917	magnesium ion binding [GO:0000287]	1
GO:0043335	protein unfolding [GO:0043335]	1
GO:0006265	DNA binding [GO:0003677]	1
GO:0006108	NAD binding [GO:0051287]	1
GO:0051301	GTPase activity [GO:0003924]	1
GO:0043419	urease activity [GO:0009039]	1
GO:0009396	methenyltetrahydrofolate cyclohydrolase activity [GO:0004477]	1
GO:0035435	phosphate ion transmembrane transport [GO:0035435]	1
GO:0005975	hydrolase activity [GO:0016787]	1
GO:0032784	regulation of DNA-templated transcription, elongation [GO:0032784]	1
GO:0018307	nickel cation binding [GO:0016151]	1
GO:0006281	serine-type endopeptidase activity [GO:0004252]	1
GO:0006189	5-(carboxyamino)imidazole ribonucleotide synthase activity [GO:0034028]	1
GO:0006310	metal ion binding [GO:0046872]	1
GO:0000921	septin ring assembly [GO:0000921]	1
GO:0009058	UDP-glucose metabolic process [GO:0006011]	1
GO:0051301	DNA binding [GO:0003677]	1
GO:0000105	L-phenylalanine:2-oxoglutarate aminotransferase activity [GO:0080130]	1
GO:0006310	single-stranded DNA binding [GO:0003697]	1
GO:0019441	tryptophan catabolic process to kynurenine [GO:0019441]	1
GO:0030259	cell division [GO:0051301]	1
GO:0006260	cytoplasm [GO:0005737]	1
GO:0051301	UDP-N-acetylmuramate dehydrogenase activity [GO:0008762]	1
GO:0015671	oxygen transport [GO:0015671]	1
GO:0006777	nucleotide binding [GO:0000166]	1
GO:0045892	transcription factor activity, sequence-specific DNA binding [GO:0003700]	1
GO:0006401	manganese ion binding [GO:0030145]	1
GO:0006207	aspartate carbamoyltransferase activity [GO:0004070]	1
GO:0019262	cytoplasm [GO:0005737]	1
GO:0006364	rRNA catabolic process [GO:0016075]	1
GO:0046110	xanthine metabolic process [GO:0046110]	1
GO:0018364	protein-glutamine N-methyltransferase activity [GO:0036009]	1
GO:0009073	3-dehydroquinate synthase activity [GO:0003856]	1
GO:0046677	transferase activity, transferring alkyl or aryl (other than methyl) groups [GO:0016765]	1
GO:0046496	nicotinamide nucleotide metabolic process [GO:0046496]	1
GO:0009107	octanoyltransferase activity [GO:0016415]	1
GO:0019358	nicotinate-nucleotide diphosphorylase (carboxylating) activity [GO:0004514]	1
GO:0000105	imidazoleglycerol-phosphate synthase activity [GO:0000107]	1
GO:0043093	cell division site [GO:0032153]	1
GO:0005975	intramolecular transferase activity, phosphotransferases [GO:0016868]	1
GO:0006048	cytoplasm [GO:0005737]	1
GO:0009103	UDP-glucose 4-epimerase activity [GO:0003978]	1
GO:0017004	integral component of membrane [GO:0016021]	1
GO:0000716	transcription-coupled nucleotide-excision repair, DNA damage recognition [GO:0000716]	1
GO:0019430	thioredoxin-disulfide reductase activity [GO:0004791]	1
GO:0009165	5-phosphoribose 1-diphosphate biosynthetic process [GO:0006015]	1
GO:0018160	peptidyl-pyrromethane cofactor linkage [GO:0018160]	1
GO:0002100	tRNA-specific adenosine-34 deaminase activity [GO:0052717]	1
GO:0033014	uroporphyrinogen-III synthase activity [GO:0004852]	1
GO:0009423	magnesium ion binding [GO:0000287]	1
GO:0006261	damaged DNA binding [GO:0003684]	1
GO:0006779	precorrin-2 dehydrogenase activity [GO:0043115]	1
GO:0019287	isopentenyl diphosphate biosynthetic process, mevalonate pathway [GO:0019287]	1
GO:0022904	respiratory electron transport chain [GO:0022904]	1
GO:0045454	electron carrier activity [GO:0009055]	1
GO:0019877	diaminopimelate biosynthetic process [GO:0019877]	1
GO:0006631	oleate hydratase activity [GO:0050151]	1
GO:0009396	kinase activity [GO:0016301]	1
GO:0006207	hexulose-6-phosphate synthase activity [GO:0043801]	1
GO:0019262	carbohydrate metabolic process [GO:0005975]	1
GO:0006007	manganese ion binding [GO:0030145]	1
GO:0005975	magnesium ion binding [GO:0000287]	1
GO:0006071	glycerol metabolic process [GO:0006071]	1
GO:0009435	nicotinate-nucleotide adenylyltransferase activity [GO:0004515]	1
GO:0006284	damaged DNA binding [GO:0003684]	1
GO:0044208	cytoplasm [GO:0005737]	1
GO:0009089	lysine biosynthetic process via diaminopimelate [GO:0009089]	1
GO:0005975	glutamine-fructose-6-phosphate transaminase (isomerizing) activity [GO:0004360]	1
GO:0006650	glycerophospholipid metabolic process [GO:0006650]	1
GO:0009073	ATP binding [GO:0005524]	1
GO:0006353	cytoplasm [GO:0005737]	1
GO:0009423	chorismate biosynthetic process [GO:0009423]	1
GO:0015976	alcohol metabolic process [GO:0006066]	1
GO:0033212	ferrous iron transport [GO:0015684]	1
GO:0046167	glycerol-3-phosphate dehydrogenase [NAD+] activity [GO:0004367]	1
GO:0006571	tyrosine biosynthetic process [GO:0006571]	1
GO:0006002	metal ion binding [GO:0046872]	1
GO:0009399	nitrogen fixation [GO:0009399]	1
GO:0009089	pyridoxal phosphate binding [GO:0030170]	1
GO:0015969	kinase activity [GO:0016301]	1
GO:0006412	zinc ion binding [GO:0008270]	1
GO:0044238	primary metabolic process [GO:0044238]	1
GO:0022900	cytochrome-c oxidase activity [GO:0004129]	1
GO:0006749	glutathione metabolic process [GO:0006749]	1
GO:0000967	rRNA 5'-end processing [GO:0000967]	1
GO:0006555	methylenetetrahydrofolate reductase (NAD(P)H) activity [GO:0004489]	1
GO:0031647	regulation of protein stability [GO:0031647]	1
GO:0006426	glycyl-tRNA aminoacylation [GO:0006426]	1
GO:0006461	protein complex assembly [GO:0006461]	1
GO:0009451	transferase activity [GO:0016740]	1
GO:2001295	fatty acid biosynthetic process [GO:0006633]	1
GO:0019464	glycine dehydrogenase (decarboxylating) activity [GO:0004375]	1
GO:0006879	cytoplasm [GO:0005737]	1
GO:0015936	coenzyme binding [GO:0050662]	1
GO:0045892	negative regulation of fatty acid biosynthetic process [GO:0045717]	1
GO:0044205	cytoplasm [GO:0005737]	1
GO:0009234	thiamine pyrophosphate binding [GO:0030976]	1
GO:0009231	riboflavin synthase activity [GO:0004746]	1
GO:0032324	molybdopterin cofactor biosynthetic process [GO:0032324]	1
GO:0016117	transferase activity, transferring alkyl or aryl (other than methyl) groups [GO:0016765]	1
GO:0006434	seryl-tRNA aminoacylation [GO:0006434]	1
GO:0006772	thiamine metabolic process [GO:0006772]	1
GO:0009401	N-acetylglucosamine transmembrane transporter activity [GO:0015572]	1
GO:0006096	phosphoglycerate kinase activity [GO:0004618]	1
GO:0016485	protein processing [GO:0016485]	1
GO:0044205	amino acid binding [GO:0016597]	1
GO:0007049	cytoplasm [GO:0005737]	1
GO:0009229	thiamine biosynthetic process [GO:0009228]	1
GO:0015992	proton transport [GO:0015992]	1
GO:0006859	extracellular region [GO:0005576]	1
GO:0019557	histidine catabolic process to glutamate and formate [GO:0019557]	1
GO:0009432	DNA binding [GO:0003677]	1
GO:0009307	Type I site-specific deoxyribonuclease activity [GO:0009035]	1
GO:0000917	integral component of membrane [GO:0016021]	1
GO:0019557	histidine catabolic process to glutamate and formamide [GO:0019556]	1
GO:0015693	magnesium ion transmembrane transporter activity [GO:0015095]	1
GO:0019557	iron ion binding [GO:0005506]	1
GO:0006164	purine nucleotide biosynthetic process [GO:0006164]	1
GO:0006879	ferric iron binding [GO:0008199]	1
GO:0009058	transferase activity, transferring glycosyl groups [GO:0016757]	1
GO:0007155	cell wall [GO:0005618]	1
GO:0006259	endonuclease activity [GO:0004519]	1
GO:0006730	one-carbon metabolic process [GO:0006730]	1
GO:0051289	protein homotetramerization [GO:0051289]	1
GO:0046677	tRNA binding [GO:0000049]	1
GO:0042278	purine-nucleoside phosphorylase activity [GO:0004731]	1
GO:0055072	GTP binding [GO:0005525]	1
GO:0005975	sequence-specific DNA binding [GO:0043565]	1
GO:0006241	ATP binding [GO:0005524]	1
GO:0000160	sequence-specific DNA binding [GO:0043565]	1
GO:0044205	ATP binding [GO:0005524]	1
GO:0019464	glycine decarboxylation via glycine cleavage system [GO:0019464]	1
GO:0000105	NAD binding [GO:0051287]	1
GO:0000105	glutamine metabolic process [GO:0006541]	1
GO:0006428	zinc ion binding [GO:0008270]	1
GO:0051301	tyrosine-based site-specific recombinase activity [GO:0009037]	1
GO:0019285	metal ion binding [GO:0046872]	1
GO:0009143	nucleoside-triphosphatase activity [GO:0017111]	1
GO:0006457	DNA replication [GO:0006260]	1
GO:0043937	regulation of sporulation [GO:0043937]	1
GO:0006270	extrachromosomal circular DNA [GO:0005727]	1
GO:0006526	argininosuccinate synthase activity [GO:0004055]	1
GO:0006526	ATP binding [GO:0005524]	1
GO:0006072	glycerol-3-phosphate metabolic process [GO:0006072]	1
GO:0019354	siroheme biosynthetic process [GO:0019354]	1
GO:0006298	ATP binding [GO:0005524]	1
GO:0006006	oxidoreductase activity, acting on the aldehyde or oxo group of donors, NAD or NADP as acceptor [GO:0016620]	1
GO:0006633	transcription factor activity, sequence-specific DNA binding [GO:0003700]	1
GO:0051301	peptidyl-prolyl cis-trans isomerase activity [GO:0003755]	1
GO:0006098	pentose-phosphate shunt [GO:0006098]	1
GO:0005975	metal ion binding [GO:0046872]	1
GO:0007049	UDP-N-acetylmuramate-L-alanine ligase activity [GO:0008763]	1
GO:0006223	uracil salvage [GO:0006223]	1
GO:0005975	isomerase activity [GO:0016853]	1
GO:0019388	galactose-6-phosphate isomerase activity [GO:0050044]	1
GO:0044206	magnesium ion binding [GO:0000287]	1
GO:0007049	UDP-N-acetylmuramoylalanine-D-glutamate ligase activity [GO:0008764]	1
GO:0019627	urea metabolic process [GO:0019627]	1
GO:0006260	ribonucleoside-triphosphate reductase activity [GO:0008998]	1
GO:0006418	tRNA aminoacylation for protein translation [GO:0006418]	1
GO:0000902	magnesium ion binding [GO:0000287]	1
GO:0044210	ATP binding [GO:0005524]	1
GO:0006310	ATP binding [GO:0005524]	1
GO:0006397	metal ion binding [GO:0046872]	1
GO:0009156	nucleotide biosynthetic process [GO:0009165]	1
GO:0006396	RNA methyltransferase activity [GO:0008173]	1
GO:0000105	phosphoribosyl-AMP cyclohydrolase activity [GO:0004635]	1
GO:0042256	mature ribosome assembly [GO:0042256]	1
GO:0006423	cysteine-tRNA ligase activity [GO:0004817]	1
GO:0006096	glucose catabolic process [GO:0006007]	1
GO:0019877	oxidoreductase activity, acting on CH or CH2 groups, NAD or NADP as acceptor [GO:0016726]	1
GO:0006541	carbohydrate metabolic process [GO:0005975]	1
GO:1901137	carbohydrate binding [GO:0030246]	1
GO:0019509	methylthioadenosine nucleosidase activity [GO:0008930]	1
GO:0044210	cytoplasm [GO:0005737]	1
GO:0046168	glycerol-3-phosphate dehydrogenase [NADP+] activity [GO:0036439]	1
GO:0006431	tRNA binding [GO:0000049]	1
GO:0045936	negative regulation of phosphate metabolic process [GO:0045936]	1
GO:0006402	RNA binding [GO:0003723]	1
GO:0010133	proline dehydrogenase activity [GO:0004657]	1
GO:0009102	adenosylmethionine-8-amino-7-oxononanoate transaminase activity [GO:0004015]	1
GO:0016311	plasma membrane [GO:0005886]	1
GO:0046416	pyridoxal phosphate binding [GO:0030170]	1
GO:0000453	rRNA (cytosine-2'-O-)-methyltransferase activity [GO:0070677]	1
GO:0019303	cytoplasm [GO:0005737]	1
GO:0006275	regulation of DNA replication [GO:0006275]	1
GO:0006474	N-terminal protein amino acid acetylation [GO:0006474]	1
GO:0009116	nucleoside metabolic process [GO:0009116]	1
GO:0045151	acetolactate decarboxylase activity [GO:0047605]	1
GO:2001295	zinc ion binding [GO:0008270]	1
GO:0006281	four-way junction helicase activity [GO:0009378]	1
GO:0045150	N-acetyltransferase activity [GO:0008080]	1
GO:0006270	ATP binding [GO:0005524]	1
GO:0009058	oxo-acid-lyase activity [GO:0016833]	1
GO:0046797	viral procapsid maturation [GO:0046797]	1
GO:0006421	ATP binding [GO:0005524]	1
GO:0006433	prolyl-tRNA aminoacylation [GO:0006433]	1
GO:0005975	N-acetylglucosamine metabolic process [GO:0006044]	1
GO:0006777	GTP binding [GO:0005525]	1
GO:0006438	valyl-tRNA aminoacylation [GO:0006438]	1
GO:0007049	flavin adenine dinucleotide binding [GO:0050660]	1
GO:0006281	cytoplasm [GO:0005737]	1
GO:0009103	extracellular carbohydrate transport [GO:0006859]	1
GO:0006015	cytoplasm [GO:0005737]	1
GO:0006099	fumarate metabolic process [GO:0006106]	1
GO:0009236	transferase activity [GO:0016740]	1
GO:0006281	exonuclease activity [GO:0004527]	1
GO:0019556	urocanate hydratase activity [GO:0016153]	1
GO:0009102	biotin synthase activity [GO:0004076]	1
GO:0006424	tRNA binding [GO:0000049]	1
GO:0045454	dihydrolipoyl dehydrogenase activity [GO:0004148]	1
GO:0006207	'de novo' pyrimidine nucleobase biosynthetic process [GO:0006207]	1
GO:0006542	glutamine biosynthetic process [GO:0006542]	1
GO:0006817	phosphate ion transport [GO:0006817]	1
GO:0006310	four-way junction helicase activity [GO:0009378]	1
GO:0006537	glutamate synthase activity [GO:0015930]	1
GO:0006364	zinc ion binding [GO:0008270]	1
GO:0045226	kinase activity [GO:0016301]	1
GO:0006265	DNA topological change [GO:0006265]	1
GO:0032784	translation elongation factor activity [GO:0003746]	1
GO:0009307	N-methyltransferase activity [GO:0008170]	1
GO:0006044	N-acetylglucosamine-6-phosphate deacetylase activity [GO:0008448]	1
GO:0009097	pyridoxal phosphate binding [GO:0030170]	1
GO:0035998	GTP cyclohydrolase I activity [GO:0003934]	1
GO:0009073	3-phosphoshikimate 1-carboxyvinyltransferase activity [GO:0003866]	1
GO:0015886	integral component of membrane [GO:0016021]	1
GO:0019512	tagatose-bisphosphate aldolase activity [GO:0009025]	1
GO:0009249	transferase activity [GO:0016740]	1
GO:0006541	imidazoleglycerol-phosphate synthase activity [GO:0000107]	1
GO:0006782	uroporphyrinogen decarboxylase activity [GO:0004853]	1
GO:0009089	diaminopimelate biosynthetic process [GO:0019877]	1
GO:0009408	protein folding [GO:0006457]	1
GO:0070475	rRNA binding [GO:0019843]	1
GO:0006265	DNA topoisomerase type II (ATP-hydrolyzing) activity [GO:0003918]	1
GO:0019594	mannitol-1-phosphate 5-dehydrogenase activity [GO:0008926]	1
GO:0006777	4 iron, 4 sulfur cluster binding [GO:0051539]	1
GO:0009435	ligase activity [GO:0016874]	1
GO:0019512	D-tagatose 6-phosphate catabolic process [GO:2001059]	1
GO:0045454	flavin adenine dinucleotide binding [GO:0050660]	1
GO:0009228	thiamine-phosphate diphosphorylase activity [GO:0004789]	1
GO:0030497	fatty acid elongation [GO:0030497]	1
GO:0005975	N-acetylneuraminate catabolic process [GO:0019262]	1
GO:0015684	integral component of membrane [GO:0016021]	1
GO:0009401	phosphoenolpyruvate-protein phosphotransferase activity [GO:0008965]	1
GO:0006166	purine ribonucleoside salvage [GO:0006166]	1
GO:0042450	cytoplasm [GO:0005737]	1
GO:0006747	FMN adenylyltransferase activity [GO:0003919]	1
GO:0006235	dTDP biosynthetic process [GO:0006233]	1
GO:0042823	glutamine catabolic process [GO:0006543]	1
GO:0009234	o-succinylbenzoate-CoA ligase activity [GO:0008756]	1
GO:0032265	cytoplasm [GO:0005737]	1
GO:0015628	protein transporter activity [GO:0008565]	1
GO:0009086	zinc ion binding [GO:0008270]	1
GO:0005975	orotidine-5'-phosphate decarboxylase activity [GO:0004590]	1
GO:0032049	integral component of membrane [GO:0016021]	1
GO:0006435	threonyl-tRNA aminoacylation [GO:0006435]	1
GO:0009058	ligase activity [GO:0016874]	1
GO:0097173	carbohydrate binding [GO:0030246]	1
GO:0006541	'de novo' IMP biosynthetic process [GO:0006189]	1
GO:0030435	sporulation resulting in formation of a cellular spore [GO:0030435]	1
GO:0070084	protein initiator methionine removal [GO:0070084]	1
GO:0006139	nucleobase-containing compound metabolic process [GO:0006139]	1
GO:0009607	response to biotic stimulus [GO:0009607]	1
GO:0018298	protein-chromophore linkage [GO:0018298]	1
GO:0006523	cytoplasm [GO:0005737]	1
GO:0008299	NADPH binding [GO:0070402]	1
GO:0009231	FMN biosynthetic process [GO:0009398]	1
GO:0030004	NADH dehydrogenase (ubiquinone) activity [GO:0008137]	1
GO:0009401	protein-N(PI)-phosphohistidine-fructose phosphotransferase system transporter activity [GO:0022877]	1
GO:0006420	ATP binding [GO:0005524]	1
GO:0044209	cytoplasm [GO:0005737]	1
GO:0009264	carbohydrate catabolic process [GO:0016052]	1
GO:0006233	thymidylate kinase activity [GO:0004798]	1
GO:0045226	extracellular polysaccharide biosynthetic process [GO:0045226]	1
GO:0009398	FAD biosynthetic process [GO:0006747]	1
GO:0016052	cytoplasm [GO:0005737]	1
GO:0006886	P-P-bond-hydrolysis-driven protein transmembrane transporter activity [GO:0015450]	1
GO:0065002	ATP binding [GO:0005524]	1
GO:0006537	iron-sulfur cluster binding [GO:0051536]	1
GO:0006534	pyridoxal phosphate binding [GO:0030170]	1
GO:0009073	aromatic amino acid family biosynthetic process [GO:0009073]	1
GO:0031564	translation elongation factor activity [GO:0003746]	1
GO:0008654	phospholipid biosynthetic process [GO:0008654]	1
GO:0006464	peptide-methionine (S)-S-oxide reductase activity [GO:0008113]	1
GO:0009247	enterobacterial common antigen biosynthetic process [GO:0009246]	1
GO:0006564	amino acid binding [GO:0016597]	1
GO:0008616	queuosine biosynthetic process [GO:0008616]	1
GO:0006310	cytoplasm [GO:0005737]	1
GO:0006289	zinc ion binding [GO:0008270]	1
GO:0045149	acetoin metabolic process [GO:0045149]	1
GO:0009165	nucleotide biosynthetic process [GO:0009165]	1
GO:0019264	glycine hydroxymethyltransferase activity [GO:0004372]	1
GO:0006066	metal ion binding [GO:0046872]	1
GO:0009098	NAD binding [GO:0051287]	1
GO:0006044	glucosamine-6-phosphate deaminase activity [GO:0004342]	1
GO:0008299	transferase activity [GO:0016740]	1
GO:0046656	metal ion binding [GO:0046872]	1
GO:0008616	transferase activity [GO:0016740]	1
GO:0070395	glycolipid biosynthetic process [GO:0009247]	1
GO:0009435	NAD+ synthase (glutamine-hydrolyzing) activity [GO:0003952]	1
GO:0006826	iron ion transport [GO:0006826]	1
GO:0045454	NADP binding [GO:0050661]	1
GO:0031564	transcription antitermination [GO:0031564]	1
GO:0045454	thioredoxin peroxidase activity [GO:0008379]	1
GO:0045717	fatty acid biosynthetic process [GO:0006633]	1
GO:0005975	catalytic activity [GO:0003824]	1
GO:0006526	'de novo' UMP biosynthetic process [GO:0044205]	1
GO:0006228	nucleoside diphosphate kinase activity [GO:0004550]	1
GO:0006051	N-acylglucosamine-6-phosphate 2-epimerase activity [GO:0047465]	1
GO:0042823	pyridoxal phosphate biosynthetic process [GO:0042823]	1
GO:0006006	NADP binding [GO:0050661]	1
GO:0006168	adenine salvage [GO:0006168]	1
GO:0006260	ribonucleoside-diphosphate reductase activity, thioredoxin disulfide as acceptor [GO:0004748]	1
GO:0015942	molybdenum ion binding [GO:0030151]	1
GO:0006450	transferase activity [GO:0016740]	1
GO:0006596	polyamine biosynthetic process [GO:0006596]	1
GO:0006351	negative regulation of transcription, DNA-templated [GO:0045892]	1
GO:0005975	cation binding [GO:0043169]	1
GO:0009403	toxin biosynthetic process [GO:0009403]	1
GO:0009405	transcription factor activity, sequence-specific DNA binding [GO:0003700]	1
GO:0051304	chromosome separation [GO:0051304]	1
GO:0006520	threonine aldolase activity [GO:0004793]	1
GO:0006354	DNA-templated transcription, elongation [GO:0006354]	1
GO:0034077	magnesium ion binding [GO:0000287]	1
GO:0006541	glutamate biosynthetic process [GO:0006537]	1
GO:0008299	mevalonate kinase activity [GO:0004496]	1
GO:0005975	glycerol-3-phosphate dehydrogenase [NAD(P)+] activity [GO:0047952]	1
GO:0046386	deoxyribonucleotide catabolic process [GO:0009264]	1
GO:0016075	mRNA processing [GO:0006397]	1
GO:0006520	cellular amino acid metabolic process [GO:0006520]	1
GO:0009408	response to heat [GO:0009408]	1
GO:0006449	translation release factor activity, codon specific [GO:0016149]	1
GO:0097056	selenocysteine biosynthetic process [GO:0016260]	1
GO:0042777	proton-transporting ATP synthase complex, catalytic core F(1) [GO:0045261]	1
GO:0006809	nitric-oxide synthase activity [GO:0004517]	1
GO:0006304	DNA modification [GO:0006304]	1
GO:0006614	GTP binding [GO:0005525]	1
GO:0006268	DNA binding [GO:0003677]	1
GO:0009086	histidine biosynthetic process [GO:0000105]	1
GO:0017148	negative regulation of translation [GO:0017148]	1
GO:0009052	ribose-5-phosphate isomerase activity [GO:0004751]	1
GO:0006189	amidophosphoribosyltransferase activity [GO:0004044]	1
GO:0009073	shikimate 3-dehydrogenase (NADP+) activity [GO:0004764]	1
GO:0007062	sister chromatid cohesion [GO:0007062]	1
GO:0008360	UDP-N-acetylglucosamine biosynthetic process [GO:0006048]	1
GO:0019674	ATP binding [GO:0005524]	1
GO:0046677	regulation of cell shape [GO:0008360]	1
GO:0006783	metal ion binding [GO:0046872]	1
GO:0009086	methionine biosynthetic process [GO:0009086]	1
GO:0007049	UDP-N-acetyl-D-glucosamine:N-acetylmuramoyl-L-alanyl-D-glutamyl-meso-2,6-diaminopimelyl-D-alanyl-D-alanine-diphosphoundecaprenol 4-beta-N-acetylglucosaminlytransferase activity [GO:0051991]	1
GO:0030643	cytoplasm [GO:0005737]	1
GO:0006537	integral component of membrane [GO:0016021]	1
GO:0042274	ribosomal small subunit biogenesis [GO:0042274]	1
GO:0048034	integral component of membrane [GO:0016021]	1
GO:0007049	DNA binding [GO:0003677]	1
GO:0009264	deoxyribonucleotide catabolic process [GO:0009264]	1
GO:0019284	adenosylhomocysteine nucleosidase activity [GO:0008782]	1
GO:0009228	thiamine biosynthetic process [GO:0009228]	1
GO:0006081	cellular aldehyde metabolic process [GO:0006081]	1
GO:0042126	nitrate reductase complex [GO:0009325]	1
GO:0006106	fumarate hydratase activity [GO:0004333]	1
GO:0009252	transferase activity, transferring amino-acyl groups [GO:0016755]	1
GO:0006011	UTP:glucose-1-phosphate uridylyltransferase activity [GO:0003983]	1
GO:0006725	isomerase activity [GO:0016853]	1
GO:0043171	tripeptide aminopeptidase activity [GO:0045148]	1
GO:0019521	gluconokinase activity [GO:0046316]	1
GO:0043093	cytoplasm [GO:0005737]	1
GO:0006207	plasma membrane [GO:0005886]	1
GO:0019836	host cell plasma membrane [GO:0020002]	1
GO:0006304	endonuclease activity [GO:0004519]	1
GO:0007049	ATP binding [GO:0005524]	1
GO:0001123	transcription initiation from bacterial-type RNA polymerase promoter [GO:0001123]	1
GO:0006313	chromosome segregation [GO:0007059]	1
GO:0042773	cell [GO:0005623]	1
GO:0006094	glucose-6-phosphate isomerase activity [GO:0004347]	1
GO:0051301	undecaprenyldiphospho-muramoylpentapeptide beta-N-acetylglucosaminyltransferase activity [GO:0050511]	1
GO:0046113	pseudouridylate synthase activity [GO:0004730]	1
GO:0006207	carbamoyl-phosphate synthase (glutamine-hydrolyzing) activity [GO:0004088]	1
GO:0016260	serine-tRNA ligase activity [GO:0004828]	1
GO:0045892	zinc ion binding [GO:0008270]	1
GO:0019556	imidazolonepropionase activity [GO:0050480]	1
GO:0009246	1,2-diacylglycerol 3-glucosyltransferase activity [GO:0047228]	1
GO:0042158	plasma membrane [GO:0005886]	1
GO:0046417	aromatic amino acid family biosynthetic process [GO:0009073]	1
GO:0090071	negative regulation of ribosome biogenesis [GO:0090071]	1
GO:0006282	regulation of DNA repair [GO:0006282]	1
GO:0000105	histidine biosynthetic process [GO:0000105]	1
GO:0000105	methylenetetrahydrofolate dehydrogenase (NADP+) activity [GO:0004488]	1
GO:0006633	holo-[acyl-carrier-protein] synthase activity [GO:0008897]	1
GO:0000917	cytoplasm [GO:0005737]	1
GO:0009099	valine biosynthetic process [GO:0009099]	1
GO:0019464	transaminase activity [GO:0008483]	1
GO:0006284	cytoplasm [GO:0005737]	1
GO:0006545	glycine biosynthetic process [GO:0006545]	1
GO:0006014	ribokinase activity [GO:0004747]	1
GO:0051603	threonine-type endopeptidase activity [GO:0004298]	1
GO:0015886	heme binding [GO:0020037]	1
GO:0006396	magnesium ion binding [GO:0000287]	1
GO:0009432	single-stranded DNA binding [GO:0003697]	1
GO:0007049	UDP-N-acetylmuramoylalanyl-D-glutamyl-2,6-diaminopimelate-D-alanyl-D-alanine ligase activity [GO:0008766]	1
GO:0006308	cytoplasm [GO:0005737]	1
GO:0009432	excinuclease repair complex [GO:0009380]	1
GO:0000302	response to reactive oxygen species [GO:0000302]	1
GO:0009107	lipoyl(octanoyl) transferase activity [GO:0033819]	1
GO:0015986	plasma membrane [GO:0005886]	1
GO:0000027	rRNA binding [GO:0019843]	1
GO:0007059	cell cycle [GO:0007049]	1
GO:0015693	magnesium ion transport [GO:0015693]	1
GO:0006813	solute:proton antiporter activity [GO:0015299]	1
GO:0009409	response to cold [GO:0009409]	1
GO:0006741	NAD+ kinase activity [GO:0003951]	1

## Sheet: Molecular Functions
GO_Id	GO_Term	Number of ORF
GO:0005524	ATP binding [GO:0005524]	78
GO:0003677	DNA binding [GO:0003677]	71
GO:0005524	cytoplasm [GO:0005737]	49
GO:0016787	hydrolase activity [GO:0016787]	38
GO:0016887	ATPase activity [GO:0016887]	36
GO:0003735	structural constituent of ribosome [GO:0003735]	33
GO:0046872	metal ion binding [GO:0046872]	29
GO:0016491	oxidoreductase activity [GO:0016491]	28
GO:0003700	transcription factor activity, sequence-specific DNA binding [GO:0003700]	26
GO:0003824	catalytic activity [GO:0003824]	19
GO:0008080	N-acetyltransferase activity [GO:0008080]	16
GO:0003677	cytoplasm [GO:0005737]	14
GO:0008168	methyltransferase activity [GO:0008168]	13
GO:0003677	intracellular [GO:0005622]	13
GO:0005524	integral component of membrane [GO:0016021]	13
GO:0008270	zinc ion binding [GO:0008270]	13
GO:0000287	magnesium ion binding [GO:0000287]	12
GO:0019843	ribosome [GO:0005840]	12
GO:0043565	sequence-specific DNA binding [GO:0043565]	12
GO:0005215	transporter activity [GO:0005215]	12
GO:0016301	kinase activity [GO:0016301]	10
GO:0008982	phosphoenolpyruvate-dependent sugar phosphotransferase system [GO:0009401]	10
GO:0008233	peptidase activity [GO:0008233]	9
GO:0016740	transferase activity [GO:0016740]	9
GO:0003676	nucleic acid binding [GO:0003676]	9
GO:0020037	heme binding [GO:0020037]	8
GO:0051287	NAD binding [GO:0051287]	8
GO:0016829	lyase activity [GO:0016829]	7
GO:0005525	GTP binding [GO:0005525]	7
GO:0051539	4 iron, 4 sulfur cluster binding [GO:0051539]	7
GO:0030145	manganese ion binding [GO:0030145]	7
GO:0000049	tRNA binding [GO:0000049]	7
GO:0003677	ATP binding [GO:0005524]	7
GO:0000155	phosphorelay sensor kinase activity [GO:0000155]	7
GO:0003723	pseudouridine synthase activity [GO:0009982]	7
GO:0009982	RNA binding [GO:0003723]	6
GO:0030170	transaminase activity [GO:0008483]	6
GO:0016747	transferase activity, transferring acyl groups other than amino-acyl groups [GO:0016747]	6
GO:0016757	transferase activity, transferring glycosyl groups [GO:0016757]	6
GO:0015171	integral component of membrane [GO:0016021]	6
GO:0003723	RNA binding [GO:0003723]	6
GO:0050662	coenzyme binding [GO:0050662]	5
GO:0010181	FMN binding [GO:0010181]	5
GO:0004252	serine-type endopeptidase activity [GO:0004252]	5
GO:0004386	helicase activity [GO:0004386]	5
GO:0004222	metalloendopeptidase activity [GO:0004222]	5
GO:0016874	ligase activity [GO:0016874]	5
GO:0030170	pyridoxal phosphate binding [GO:0030170]	5
GO:0016301	plasma membrane [GO:0005886]	5
GO:0005524	ATP-binding cassette (ABC) transporter complex [GO:0043190]	5
GO:0004725	protein tyrosine phosphatase activity [GO:0004725]	5
GO:0003700	carbohydrate metabolic process [GO:0005975]	4
GO:0005215	transmembrane transport [GO:0055085]	4
GO:0019843	small ribosomal subunit [GO:0015935]	4
GO:0003723	cytoplasm [GO:0005737]	4
GO:0019843	rRNA binding [GO:0019843]	4
GO:0003887	DNA replication [GO:0006260]	4
GO:0050660	flavin adenine dinucleotide binding [GO:0050660]	4
GO:0005525	cytoplasm [GO:0005737]	4
GO:0046933	proton-transporting ATP synthase activity, rotational mechanism [GO:0046933]	4
GO:0002161	aminoacyl-tRNA editing activity [GO:0002161]	4
GO:0016740	glutamine metabolic process [GO:0006541]	4
GO:0005506	iron ion binding [GO:0005506]	3
GO:0005524	plasma membrane [GO:0005886]	3
GO:0015105	integral component of membrane [GO:0016021]	3
GO:0008483	biosynthetic process [GO:0009058]	3
GO:0016987	transcription factor activity, sequence-specific DNA binding [GO:0003700]	3
GO:0015035	glycerol ether metabolic process [GO:0006662]	3
GO:0030983	mismatch repair [GO:0006298]	3
GO:0016798	hydrolase activity, acting on glycosyl bonds [GO:0016798]	3
GO:0004371	glycerol metabolic process [GO:0006071]	3
GO:0003700	DNA-templated transcription, initiation [GO:0006352]	3
GO:0030246	DNA binding [GO:0003677]	3
GO:0051536	iron-sulfur cluster binding [GO:0051536]	3
GO:0016746	transferase activity, transferring acyl groups [GO:0016746]	3
GO:0003684	DNA repair [GO:0006281]	3
GO:0016787	integral component of membrane [GO:0016021]	3
GO:0003677	carbohydrate binding [GO:0030246]	3
GO:0016853	isomerase activity [GO:0016853]	3
GO:0033711	4-phosphoerythronate dehydrogenase activity [GO:0033711]	3
GO:0005524	chromosome [GO:0005694]	3
GO:0009055	electron carrier activity [GO:0009055]	3
GO:0003899	DNA-directed RNA polymerase activity [GO:0003899]	3
GO:0003676	DNA integration [GO:0015074]	3
GO:0030976	thiamine pyrophosphate binding [GO:0030976]	3
GO:0004601	peroxidase activity [GO:0004601]	3
GO:0051539	cytoplasm [GO:0005737]	3
GO:0008236	serine-type peptidase activity [GO:0008236]	2
GO:0004803	transposase activity [GO:0004803]	2
GO:0008270	riboflavin biosynthetic process [GO:0009231]	2
GO:0015035	cell redox homeostasis [GO:0045454]	2
GO:0008677	cytoplasm [GO:0005737]	2
GO:0016151	nickel cation binding [GO:0016151]	2
GO:0003684	damaged DNA binding [GO:0003684]	2
GO:0003887	DNA-directed DNA polymerase activity [GO:0003887]	2
GO:0008641	small protein activating enzyme activity [GO:0008641]	2
GO:0004497	iron assimilation [GO:0033212]	2
GO:0004459	cytoplasm [GO:0005737]	2
GO:0008784	pyridoxal phosphate binding [GO:0030170]	2
GO:0004519	endonuclease activity [GO:0004519]	2
GO:0003989	acetyl-CoA carboxylase activity [GO:0003989]	2
GO:0005506	heme catabolic process [GO:0042167]	2
GO:0003697	DNA replication [GO:0006260]	2
GO:0050661	NADP binding [GO:0050661]	2
GO:0003676	DNA recombination [GO:0006310]	2
GO:0008761	UDP-N-acetylglucosamine 2-epimerase activity [GO:0008761]	2
GO:0043365	4 iron, 4 sulfur cluster binding [GO:0051539]	2
GO:0008173	RNA methyltransferase activity [GO:0008173]	2
GO:0004775	succinate-CoA ligase (ADP-forming) activity [GO:0004775]	2
GO:0004585	ornithine carbamoyltransferase activity [GO:0004585]	2
GO:0004826	phenylalanine-tRNA ligase activity [GO:0004826]	2
GO:0000166	nucleotide binding [GO:0000166]	2
GO:0000049	phenylalanyl-tRNA aminoacylation [GO:0006432]	2
GO:0003697	SOS response [GO:0009432]	2
GO:0003951	NAD+ kinase activity [GO:0003951]	2
GO:0004602	glutathione peroxidase activity [GO:0004602]	2
GO:0042286	glutamate-1-semialdehyde 2,1-aminomutase activity [GO:0042286]	2
GO:0008883	NADP binding [GO:0050661]	2
GO:0046961	plasma membrane ATP synthesis coupled proton transport [GO:0042777]	2
GO:0015343	siderophore biosynthetic process [GO:0019290]	2
GO:0004053	arginase activity [GO:0004053]	2
GO:0004834	tryptophan synthase activity [GO:0004834]	2
GO:0008026	ATP-dependent helicase activity [GO:0008026]	2
GO:0005524	acetyl-CoA carboxylase complex [GO:0009317]	2
GO:0005351	phosphoenolpyruvate-dependent sugar phosphotransferase system [GO:0009401]	2
GO:0016879	ligase activity, forming carbon-nitrogen bonds [GO:0016879]	2
GO:0003677	extrachromosomal circular DNA [GO:0005727]	2
GO:0050661	glutamyl-tRNA reductase activity [GO:0008883]	2
GO:0016887	ATP binding [GO:0005524]	2
GO:0008270	carbohydrate metabolic process [GO:0005975]	2
GO:0050661	2-dehydropantoate 2-reductase activity [GO:0008677]	2
GO:0015450	integral component of membrane [GO:0016021]	2
GO:0008094	DNA-dependent ATPase activity [GO:0008094]	2
GO:0042586	peptide deformylase activity [GO:0042586]	2
GO:0004806	triglyceride lipase activity [GO:0004806]	2
GO:0000286	L-alanine catabolic process [GO:0042853]	2
GO:0003995	acyl-CoA dehydrogenase activity [GO:0003995]	2
GO:0003924	GTPase activity [GO:0003924]	2
GO:0000104	succinate dehydrogenase activity [GO:0000104]	2
GO:0004392	iron ion binding [GO:0005506]	2
GO:0008760	UDP-N-acetylglucosamine 1-carboxyvinyltransferase activity [GO:0008760]	2
GO:0051537	2 iron, 2 sulfur cluster binding [GO:0051537]	2
GO:0016149	translation release factor activity, codon specific [GO:0016149]	2
GO:0015297	integral component of membrane [GO:0016021]	2
GO:0009378	SOS response [GO:0009432]	2
GO:0003676	DNA repair [GO:0006281]	2
GO:0042626	ATP binding [GO:0005524]	2
GO:0004476	zinc ion binding [GO:0008270]	2
GO:0022877	sugar:proton symporter activity [GO:0005351]	2
GO:0008942	nitrate assimilation [GO:0042128]	2
GO:0003677	DNA polymerase III complex [GO:0009360]	2
GO:0005198	viral capsid [GO:0019028]	2
GO:0008408	3'-5' exonuclease activity [GO:0008408]	2
GO:0016415	lipoate biosynthetic process [GO:0009107]	2
GO:0016773	phosphotransferase activity, alcohol group as acceptor [GO:0016773]	2
GO:0016597	cytoplasm [GO:0005737]	2
GO:0008237	metallopeptidase activity [GO:0008237]	2
GO:0019825	oxygen binding [GO:0019825]	2
GO:0030246	carbohydrate binding [GO:0030246]	2
GO:0003700	negative regulation of transcription, DNA-templated [GO:0045892]	2
GO:0016788	hydrolase activity, acting on ester bonds [GO:0016788]	2
GO:0008889	glycerophosphodiester phosphodiesterase activity [GO:0008889]	2
GO:0008324	integral component of membrane [GO:0016021]	2
GO:0046872	plasma membrane [GO:0005886]	2
GO:0008483	protoporphyrinogen IX biosynthetic process [GO:0006782]	2
GO:0046872	DNA repair [GO:0006281]	2
GO:0015658	integral component of membrane [GO:0016021]	2
GO:0004642	'de novo' IMP biosynthetic process [GO:0006189]	2
GO:0043565	transcription factor activity, sequence-specific DNA binding [GO:0003700]	2
GO:0008982	protein-N(PI)-phosphohistidine-sugar phosphotransferase activity [GO:0008982]	2
GO:0008940	nitrate reductase activity [GO:0008940]	2
GO:0017153	sodium:dicarboxylate symporter activity [GO:0017153]	2
GO:0047355	membrane [GO:0016020]	2
GO:0016820	hydrolase activity, acting on acid anhydrides, catalyzing transmembrane movement of substances [GO:0016820]	2
GO:0030955	potassium ion binding [GO:0030955]	2
GO:0046872	arginine metabolic process [GO:0006525]	2
GO:0004497	monooxygenase activity [GO:0004497]	2
GO:0030170	D-alanine biosynthetic process [GO:0030632]	2
GO:0008658	penicillin binding [GO:0008658]	2
GO:0003678	DNA binding [GO:0003677]	1
GO:0004126	cytidine deaminase activity [GO:0004126]	1
GO:0019239	deaminase activity [GO:0019239]	1
GO:0016740	phosphoenolpyruvate-dependent sugar phosphotransferase system [GO:0009401]	1
GO:0071949	FAD binding [GO:0071949]	1
GO:0000150	recombinase activity [GO:0000150]	1
GO:0015093	plasma membrane [GO:0005886]	1
GO:0046933	ATP hydrolysis coupled proton transport [GO:0015991]	1
GO:0008774	acetaldehyde dehydrogenase (acetylating) activity [GO:0008774]	1
GO:0005506	metalloendopeptidase activity [GO:0004222]	1
GO:0016597	prephenate dehydratase activity [GO:0004664]	1
GO:0003676	asparaginyl-tRNA aminoacylation [GO:0006421]	1
GO:0005315	integral component of plasma membrane [GO:0005887]	1
GO:0000287	glutamine metabolic process [GO:0006541]	1
GO:0008531	riboflavin biosynthetic process [GO:0009231]	1
GO:0016787	cardiolipin synthase activity [GO:0008808]	1
GO:0016868	magnesium ion binding [GO:0000287]	1
GO:0004222	N(6)-L-threonylcarbamoyladenine synthase [GO:0061711]	1
GO:0051287	histidinol dehydrogenase activity [GO:0004399]	1
GO:0003688	DNA replication origin binding [GO:0003688]	1
GO:0008270	transcription, DNA-templated [GO:0006351]	1
GO:0003920	GMP reductase complex [GO:1902560]	1
GO:0004731	purine nucleoside metabolic process [GO:0042278]	1
GO:0015438	teichoic acid transport [GO:0015777]	1
GO:0030698	cytoplasm [GO:0005737]	1
GO:0019843	nucleotide binding [GO:0000166]	1
GO:0016757	biosynthetic process [GO:0009058]	1
GO:0004641	'de novo' IMP biosynthetic process [GO:0006189]	1
GO:0016153	histidine catabolic process to glutamate and formate [GO:0019557]	1
GO:0003725	double-stranded RNA binding [GO:0003725]	1
GO:0000287	DNA-dependent DNA replication [GO:0006261]	1
GO:0046538	2,3-bisphosphoglycerate-dependent phosphoglycerate mutase activity [GO:0046538]	1
GO:0008840	cytoplasm [GO:0005737]	1
GO:0008649	rRNA methyltransferase activity [GO:0008649]	1
GO:0016614	oxidoreductase activity, acting on CH-OH group of donors [GO:0016614]	1
GO:0003862	cytoplasm [GO:0005737]	1
GO:0003952	NAD+ synthase activity [GO:0008795]	1
GO:0003755	plasma membrane [GO:0005886]	1
GO:0016149	regulation of translational termination [GO:0006449]	1
GO:0015930	transferase activity [GO:0016740]	1
GO:0004733	pyridoxamine-phosphate oxidase activity [GO:0004733]	1
GO:0008889	integral component of membrane [GO:0016021]	1
GO:0043022	ribosome binding [GO:0043022]	1
GO:0004516	NAD biosynthetic process [GO:0009435]	1
GO:0004637	'de novo' IMP biosynthetic process [GO:0006189]	1
GO:0008171	O-methyltransferase activity [GO:0008171]	1
GO:0050480	zinc ion binding [GO:0008270]	1
GO:0004496	isoprenoid biosynthetic process [GO:0008299]	1
GO:0005524	amino acid-transporting ATPase activity [GO:0015424]	1
GO:0009055	NAD binding [GO:0051287]	1
GO:0017150	tRNA dihydrouridine synthase activity [GO:0017150]	1
GO:0000287	phosphoglucosamine mutase activity [GO:0008966]	1
GO:0008168	methionine metabolic process [GO:0006555]	1
GO:0003866	cytoplasm [GO:0005737]	1
GO:0004817	ATP binding [GO:0005524]	1
GO:0005524	CTP synthase activity [GO:0003883]	1
GO:0047465	N-acetylmannosamine metabolic process [GO:0006051]	1
GO:0000287	phosphoribosylformylglycinamidine synthase activity [GO:0004642]	1
GO:0050660	protein disulfide oxidoreductase activity [GO:0015035]	1
GO:0003723	5'-3' exoribonuclease activity [GO:0004534]	1
GO:0008484	sulfuric ester hydrolase activity [GO:0008484]	1
GO:0004252	SOS response [GO:0009432]	1
GO:0003855	3-dehydroquinate dehydratase activity [GO:0003855]	1
GO:0045148	zinc ion binding [GO:0008270]	1
GO:0008289	lipid binding [GO:0008289]	1
GO:0050660	integral component of membrane [GO:0016021]	1
GO:0000287	DNA topological change [GO:0006265]	1
GO:0003677	deoxyribonuclease IV (phage-T4-induced) activity [GO:0008833]	1
GO:0000287	leucine biosynthetic process [GO:0009098]	1
GO:0005524	mismatch repair complex [GO:0032300]	1
GO:0004047	aminomethyltransferase activity [GO:0004047]	1
GO:0003743	translation initiation factor activity [GO:0003743]	1
GO:0009381	helicase activity [GO:0004386]	1
GO:0004477	folic acid-containing compound biosynthetic process [GO:0009396]	1
GO:0005524	cytosol [GO:0005829]	1
GO:0003677	DNA N-glycosylase activity [GO:0019104]	1
GO:0004045	cytoplasm [GO:0005737]	1
GO:0003746	transcription, DNA-templated [GO:0006351]	1
GO:0004385	guanylate kinase activity [GO:0004385]	1
GO:0004148	flavin adenine dinucleotide binding [GO:0050660]	1
GO:0016726	lysine biosynthetic process via diaminopimelate [GO:0009089]	1
GO:0016987	sigma factor activity [GO:0016987]	1
GO:0051287	cell [GO:0005623]	1
GO:0003746	translation elongation factor activity [GO:0003746]	1
GO:0004056	argininosuccinate lyase activity [GO:0004056]	1
GO:0008176	tRNA (guanine-N7-)-methyltransferase activity [GO:0008176]	1
GO:0008785	alkyl hydroperoxide reductase activity [GO:0008785]	1
GO:0004129	cytochrome bo3 ubiquinol oxidase activity [GO:0009486]	1
GO:0016597	amino acid binding [GO:0016597]	1
GO:0047117	NADP binding [GO:0050661]	1
GO:0004617	L-serine biosynthetic process [GO:0006564]	1
GO:0003908	DNA repair [GO:0006281]	1
GO:0046872	GTP biosynthetic process [GO:0006183]	1
GO:0070205	2-succinyl-6-hydroxy-2,4-cyclohexadiene-1-carboxylate synthase activity [GO:0070205]	1
GO:0000287	oxidoreductase activity [GO:0016491]	1
GO:0000287	barrier septum assembly [GO:0000917]	1
GO:0008706	6-phospho-beta-glucosidase activity [GO:0008706]	1
GO:0008324	antiporter activity [GO:0015297]	1
GO:0004592	pantoate-beta-alanine ligase activity [GO:0004592]	1
GO:0016740	malonyl-CoA biosynthetic process [GO:2001295]	1
GO:0047473	D-alanine-poly(phosphoribitol) ligase activity [GO:0047473]	1
GO:0036370	D-alanyl carrier activity [GO:0036370]	1
GO:0030145	phosphoribosylamine-glycine ligase activity [GO:0004637]	1
GO:0008762	cytoplasm [GO:0005737]	1
GO:0016787	plasma membrane [GO:0005886]	1
GO:0004748	DNA replication [GO:0006260]	1
GO:0004764	chorismate biosynthetic process [GO:0009423]	1
GO:0008747	N-acetylneuraminate lyase activity [GO:0008747]	1
GO:0000049	methionyl-tRNA aminoacylation [GO:0006431]	1
GO:0003978	coenzyme binding [GO:0050662]	1
GO:0008757	RNA binding [GO:0003723]	1
GO:0004488	methionine biosynthetic process [GO:0009086]	1
GO:0008409	5'-3' exonuclease activity [GO:0008409]	1
GO:0017111	nucleoside-triphosphate diphosphatase activity [GO:0047429]	1
GO:0016740	regulation of cell shape [GO:0008360]	1
GO:0033862	UMP kinase activity [GO:0033862]	1
GO:0004514	nicotinate nucleotide salvage [GO:0019358]	1
GO:0003861	3-isopropylmalate dehydratase complex [GO:0009316]	1
GO:0016740	fatty acid biosynthetic process [GO:0006633]	1
GO:0008234	integral component of membrane [GO:0016021]	1
GO:0000287	aromatic amino acid family biosynthetic process [GO:0009073]	1
GO:0000175	cytoplasm [GO:0005737]	1
GO:0030246	cytoplasm [GO:0005737]	1
GO:0042626	plasma membrane [GO:0005886]	1
GO:0004342	carbohydrate metabolic process [GO:0005975]	1
GO:0003949	cytoplasm [GO:0005737]	1
GO:0000287	fatty acid biosynthetic process [GO:0006633]	1
GO:0016639	glutamate biosynthetic process [GO:0006537]	1
GO:0046872	malate metabolic process [GO:0006108]	1
GO:0033743	peptide-methionine (R)-S-oxide reductase activity [GO:0033743]	1
GO:0008170	site-specific DNA-methyltransferase (adenine-specific) activity [GO:0009007]	1
GO:0050660	NADP binding [GO:0050661]	1
GO:0009025	lactose catabolic process via tagatose-6-phosphate [GO:0019512]	1
GO:0050660	cell redox homeostasis [GO:0045454]	1
GO:0051539	molybdopterin synthase complex [GO:0019008]	1
GO:0016832	aldehyde-lyase activity [GO:0016832]	1
GO:0016798	metal ion binding [GO:0046872]	1
GO:0004671	protein C-terminal S-isoprenylcysteine carboxyl O-methyltransferase activity [GO:0004671]	1
GO:0016722	cellular iron ion homeostasis [GO:0006879]	1
GO:0003848	2-amino-4-hydroxy-6-hydroxymethyldihydropteridine diphosphokinase activity [GO:0003848]	1
GO:0051539	nitrate reductase complex [GO:0009325]	1
GO:0004635	phosphoribosyl-ATP diphosphatase activity [GO:0004636]	1
GO:0004427	inorganic diphosphatase activity [GO:0004427]	1
GO:0004642	glutamine metabolic process [GO:0006541]	1
GO:0004412	NADP binding [GO:0050661]	1
GO:0004536	DNA binding [GO:0003677]	1
GO:0070006	metalloaminopeptidase activity [GO:0070006]	1
GO:0016920	pyroglutamyl-peptidase activity [GO:0016920]	1
GO:0008897	magnesium ion binding [GO:0000287]	1
GO:0048037	cofactor binding [GO:0048037]	1
GO:0016705	oxidoreductase activity, acting on paired donors, with incorporation or reduction of molecular oxygen [GO:0016705]	1
GO:0008930	L-methionine biosynthetic process from S-adenosylmethionine [GO:0019284]	1
GO:0005506	biotin biosynthetic process [GO:0009102]	1
GO:0004818	glutamate-tRNA ligase activity [GO:0004818]	1
GO:0005525	integral component of membrane [GO:0016021]	1
GO:0033819	octanoyltransferase activity [GO:0016415]	1
GO:0004061	arylformamidase activity [GO:0004061]	1
GO:0015137	integral component of membrane [GO:0016021]	1
GO:0008833	zinc ion binding [GO:0008270]	1
GO:0008835	diaminohydroxyphosphoribosylaminopyrimidine deaminase activity [GO:0008835]	1
GO:0008863	formate dehydrogenase (NAD+) activity [GO:0008863]	1
GO:0000107	histidine biosynthetic process [GO:0000105]	1
GO:0008728	GTP diphosphokinase activity [GO:0008728]	1
GO:0020037	membrane [GO:0016020]	1
GO:0004616	phosphoribosylaminoimidazole carboxylase activity [GO:0004638]	1
GO:0009381	excinuclease ABC activity [GO:0009381]	1
GO:0000287	DNA primase activity [GO:0003896]	1
GO:0008270	translation [GO:0006412]	1
GO:0002094	glycerophospholipid biosynthetic process [GO:0046474]	1
GO:0004519	nucleic acid binding [GO:0003676]	1
GO:0008565	establishment of competence for transformation [GO:0030420]	1
GO:0016829	lipopolysaccharide biosynthetic process [GO:0009103]	1
GO:0050334	thiaminase activity [GO:0050334]	1
GO:0008234	cytosol [GO:0005829]	1
GO:0004040	N-acetylmuramoyl-L-alanine amidase activity [GO:0008745]	1
GO:0000049	glutamyl-tRNA aminoacylation [GO:0006424]	1
GO:0004789	thiamine diphosphate biosynthetic process [GO:0009229]	1
GO:0003962	cystathionine gamma-synthase activity [GO:0003962]	1
GO:0004436	phosphoric diester hydrolase activity [GO:0008081]	1
GO:0003941	L-serine ammonia-lyase activity [GO:0003941]	1
GO:0043115	uroporphyrin-III C-methyltransferase activity [GO:0004851]	1
GO:0003918	DNA binding [GO:0003677]	1
GO:0004318	enoyl-[acyl-carrier-protein] reductase (NADPH, A-specific) activity [GO:0047117]	1
GO:0009055	4 iron, 4 sulfur cluster binding [GO:0051539]	1
GO:0008477	purine nucleosidase activity [GO:0008477]	1
GO:0016740	queuosine biosynthetic process [GO:0008616]	1
GO:0005524	primosome complex [GO:1990077]	1
GO:0000166	Mo-molybdopterin cofactor biosynthetic process [GO:0006777]	1
GO:0015103	integral component of plasma membrane [GO:0005887]	1
GO:0046872	NADP binding [GO:0050661]	1
GO:0004765	chorismate biosynthetic process [GO:0009423]	1
GO:0008199	cellular iron ion homeostasis [GO:0006879]	1
GO:0003984	acetolactate synthase activity [GO:0003984]	1
GO:0016429	tRNA (adenine-N1-)-methyltransferase activity [GO:0016429]	1
GO:0008270	isoleucyl-tRNA aminoacylation [GO:0006428]	1
GO:0004345	glucose metabolic process [GO:0006006]	1
GO:0008483	cysteine metabolic process [GO:0006534]	1
GO:0000287	thiamine pyrophosphate binding [GO:0030976]	1
GO:0003951	metal ion binding [GO:0046872]	1
GO:0004044	magnesium ion binding [GO:0000287]	1
GO:0003735	ribosomal large subunit assembly [GO:0000027]	1
GO:0004489	methyltransferase activity [GO:0008168]	1
GO:0000036	cytoplasm [GO:0005737]	1
GO:0046872	fructose 6-phosphate metabolic process [GO:0006002]	1
GO:0004595	coenzyme A biosynthetic process [GO:0015937]	1
GO:0016881	acid-amino acid ligase activity [GO:0016881]	1
GO:0004672	protein kinase activity [GO:0004672]	1
GO:0003723	3'-5'-exoribonuclease activity [GO:0000175]	1
GO:0008795	NAD biosynthetic process [GO:0009435]	1
GO:0047112	pyruvate oxidase activity [GO:0047112]	1
GO:0016874	biosynthetic process [GO:0009058]	1
GO:0015542	lipopolysaccharide biosynthetic process [GO:0009103]	1
GO:0003935	GTP cyclohydrolase II activity [GO:0003935]	1
GO:0003746	transcription antitermination [GO:0031564]	1
GO:0004822	isoleucine-tRNA ligase activity [GO:0004822]	1
GO:0070043	rRNA (guanine-N7-)-methyltransferase activity [GO:0070043]	1
GO:0019134	cell wall organization [GO:0071555]	1
GO:0070569	uridylyltransferase activity [GO:0070569]	1
GO:0003856	cytoplasm [GO:0005737]	1
GO:0015077	cellular monovalent inorganic cation homeostasis [GO:0030004]	1
GO:0015225	integral component of membrane [GO:0016021]	1
GO:0004802	transketolase activity [GO:0004802]	1
GO:0008168	RNA binding [GO:0003723]	1
GO:0004814	arginine-tRNA ligase activity [GO:0004814]	1
GO:0003755	peptidyl-prolyl cis-trans isomerase activity [GO:0003755]	1
GO:0016151	enzyme active site formation [GO:0018307]	1
GO:0015095	cobalt ion transmembrane transporter activity [GO:0015087]	1
GO:0050151	fatty acid metabolic process [GO:0006631]	1
GO:0052656	L-isoleucine transaminase activity [GO:0052656]	1
GO:0042132	fructose 1,6-bisphosphate 1-phosphatase activity [GO:0042132]	1
GO:0004820	glycine-tRNA ligase activity [GO:0004820]	1
GO:0000310	XMP salvage [GO:0032265]	1
GO:0003989	acetyl-CoA carboxylase complex [GO:0009317]	1
GO:0008745	amidase activity [GO:0004040]	1
GO:0050662	UDP-glucose 4-epimerase activity [GO:0003978]	1
GO:0016818	hydrolase activity, acting on acid anhydrides, in phosphorus-containing anhydrides [GO:0016818]	1
GO:0022869	phosphoenolpyruvate-dependent sugar phosphotransferase system [GO:0009401]	1
GO:0008270	histidine biosynthetic process [GO:0000105]	1
GO:0052855	ADP-dependent NAD(P)H-hydrate dehydratase activity [GO:0052855]	1
GO:0019104	DNA binding [GO:0003677]	1
GO:0008080	acetoin dehydrogenase activity [GO:0019152]	1
GO:0050662	hydroxymethylglutaryl-CoA reductase (NADPH) activity [GO:0004420]	1
GO:0005525	DNA binding [GO:0003677]	1
GO:0003684	metal ion binding [GO:0046872]	1
GO:0046872	cation-transporting ATPase activity [GO:0019829]	1
GO:0004070	'de novo' UMP biosynthetic process [GO:0044205]	1
GO:0003999	adenine phosphoribosyltransferase activity [GO:0003999]	1
GO:0004420	hydroxymethylglutaryl-CoA reductase activity [GO:0042282]	1
GO:0004845	UMP salvage [GO:0044206]	1
GO:0050660	heme binding [GO:0020037]	1
GO:0003918	ATP binding [GO:0005524]	1
GO:0008963	phospho-N-acetylmuramoyl-pentapeptide-transferase activity [GO:0008963]	1
GO:0003979	oxidoreductase activity, acting on the CH-CH group of donors, NAD or NADP as acceptor [GO:0016628]	1
GO:0005524	'de novo' pyrimidine nucleobase biosynthetic process [GO:0006207]	1
GO:0004360	glutamine metabolic process [GO:0006541]	1
GO:0003998	acylphosphatase activity [GO:0003998]	1
GO:0008168	menaquinone biosynthetic process [GO:0009234]	1
GO:0003676	RNA-DNA hybrid ribonuclease activity [GO:0004523]	1
GO:0016740	regulation of translational fidelity [GO:0006450]	1
GO:0008175	tRNA methyltransferase activity [GO:0008175]	1
GO:0004425	indole-3-glycerol-phosphate synthase activity [GO:0004425]	1
GO:0000155	ATP binding [GO:0005524]	1
GO:0003723	methyltransferase activity [GO:0008168]	1
GO:0004400	pyridoxal phosphate binding [GO:0030170]	1
GO:0004750	pentose-phosphate shunt [GO:0006098]	1
GO:0043169	carbohydrate metabolic process [GO:0005975]	1
GO:0015655	integral component of membrane [GO:0016021]	1
GO:0034028	ATP binding [GO:0005524]	1
GO:0033711	integral component of membrane [GO:0016021]	1
GO:0008239	dipeptidyl-peptidase activity [GO:0008239]	1
GO:0008982	trehalose transmembrane transporter activity [GO:0015574]	1
GO:0004156	dihydropteroate synthase activity [GO:0004156]	1
GO:0009024	lactose catabolic process via tagatose-6-phosphate [GO:0019512]	1
GO:0004314	[acyl-carrier-protein] S-malonyltransferase activity [GO:0004314]	1
GO:0008253	5'-nucleotidase activity [GO:0008253]	1
GO:0050661	NAD binding [GO:0051287]	1
GO:0003755	cell division [GO:0051301]	1
GO:0004534	cytoplasm [GO:0005737]	1
GO:0008270	nucleotide-excision repair [GO:0006289]	1
GO:0004751	pentose-phosphate shunt, non-oxidative branch [GO:0009052]	1
GO:0004739	pyruvate dehydrogenase (acetyl-transferring) activity [GO:0004739]	1
GO:0004825	methionine-tRNA ligase activity [GO:0004825]	1
GO:0005507	copper ion binding [GO:0005507]	1
GO:0008081	lipid metabolic process [GO:0006629]	1
GO:0004519	DNA modification [GO:0006304]	1
GO:0070011	peptidase activity, acting on L-amino acid peptides [GO:0070011]	1
GO:0008483	glycine decarboxylation via glycine cleavage system [GO:0019464]	1
GO:0000287	mRNA catabolic process [GO:0006402]	1
GO:0003994	aconitate hydratase activity [GO:0003994]	1
GO:0008270	tRNA wobble adenosine to inosine editing [GO:0002100]	1
GO:0051287	4-hydroxy-tetrahydrodipicolinate reductase [GO:0008839]	1
GO:0019843	tRNA (adenine-C2-)-methyltransferase activity [GO:0002935]	1
GO:0070204	2-succinyl-5-enolpyruvyl-6-hydroxy-3-cyclohexene-1-carboxylic-acid synthase activity [GO:0070204]	1
GO:0042781	3'-tRNA processing endoribonuclease activity [GO:0042781]	1
GO:0004333	tricarboxylic acid cycle enzyme complex [GO:0045239]	1
GO:0016872	monosaccharide binding [GO:0048029]	1
GO:0003983	biosynthetic process [GO:0009058]	1
GO:0050661	flavin adenine dinucleotide binding [GO:0050660]	1
GO:0003917	DNA topoisomerase type I activity [GO:0003917]	1
GO:0004325	ferrochelatase activity [GO:0004325]	1
GO:0016903	oxidoreductase activity, acting on the aldehyde or oxo group of donors [GO:0016903]	1
GO:0050661	glucose-6-phosphate dehydrogenase activity [GO:0004345]	1
GO:0008137	integral component of membrane [GO:0016021]	1
GO:0045302	choloylglycine hydrolase activity [GO:0045302]	1
GO:0004413	homoserine kinase activity [GO:0004413]	1
GO:0019843	ribosome binding [GO:0043022]	1
GO:0000049	rRNA base methylation [GO:0070475]	1
GO:0016624	oxidoreductase activity, acting on the aldehyde or oxo group of donors, disulfide as acceptor [GO:0016624]	1
GO:0016491	isoprenoid biosynthetic process [GO:0008299]	1
GO:0004022	alcohol dehydrogenase (NAD) activity [GO:0004022]	1
GO:0004550	UTP biosynthetic process [GO:0006228]	1
GO:0046872	NADP biosynthetic process [GO:0006741]	1
GO:0008270	queuosine biosynthetic process [GO:0008616]	1
GO:0008941	nitric oxide dioxygenase activity [GO:0008941]	1
GO:0008495	heme O biosynthetic process [GO:0048034]	1
GO:0008276	ribosome [GO:0005840]	1
GO:0005525	adenylosuccinate synthase activity [GO:0004019]	1
GO:0008756	menaquinone biosynthetic process [GO:0009234]	1
GO:0046990	N-hydroxyarylamine O-acetyltransferase activity [GO:0046990]	1
GO:0019152	acetoin catabolic process [GO:0045150]	1
GO:0016616	oxidoreductase activity, acting on the CH-OH group of donors, NAD or NADP as acceptor [GO:0016616]	1
GO:0033920	6-phospho-beta-galactosidase activity [GO:0033920]	1
GO:0008966	carbohydrate metabolic process [GO:0005975]	1
GO:0009024	D-tagatose 6-phosphate catabolic process [GO:2001059]	1
GO:0005524	6-phosphofructokinase activity [GO:0003872]	1
GO:0004791	removal of superoxide radicals [GO:0019430]	1
GO:0004601	iron assimilation [GO:0033212]	1
GO:0016301	folic acid-containing compound biosynthetic process [GO:0009396]	1
GO:0009039	urea catabolic process [GO:0043419]	1
GO:0016874	nicotinate phosphoribosyltransferase activity [GO:0004516]	1
GO:0046933	proton-transporting ATPase activity, rotational mechanism [GO:0046961]	1
GO:0004347	gluconeogenesis [GO:0006094]	1
GO:0000287	polyprenyltransferase activity [GO:0002094]	1
GO:0008972	phosphomethylpyrimidine kinase activity [GO:0008972]	1
GO:0008448	carbohydrate metabolic process [GO:0005975]	1
GO:0033818	3-oxoacyl-[acyl-carrier-protein] synthase activity [GO:0004315]	1
GO:0004315	cytoplasm [GO:0005737]	1
GO:0016627	oxidoreductase activity, acting on the CH-CH group of donors [GO:0016627]	1
GO:0030170	lysine biosynthetic process via diaminopimelate [GO:0009089]	1
GO:0008479	queuine tRNA-ribosyltransferase activity [GO:0008479]	1
GO:0036009	peptidyl-glutamine methylation [GO:0018364]	1
GO:0030151	molybdenum ion binding [GO:0030151]	1
GO:0004798	dTTP biosynthetic process [GO:0006235]	1
GO:0047473	ATP binding [GO:0005524]	1
GO:0046872	ribulose-phosphate 3-epimerase activity [GO:0004750]	1
GO:0030151	formate metabolic process [GO:0015942]	1
GO:0004852	tetrapyrrole biosynthetic process [GO:0033014]	1
GO:0050661	dihydrofolate reductase activity [GO:0004146]	1
GO:0016775	phosphotransferase activity, nitrogenous group as acceptor [GO:0016775]	1
GO:0000287	carbohydrate metabolic process [GO:0005975]	1
GO:0016407	acetyltransferase activity [GO:0016407]	1
GO:0003934	7,8-dihydroneopterin 3'-triphosphate biosynthetic process [GO:0035998]	1
GO:0000774	cytoplasm [GO:0005737]	1
GO:0004452	magnesium ion binding [GO:0000287]	1
GO:0046914	transition metal ion binding [GO:0046914]	1
GO:0016682	ATP synthesis coupled electron transport [GO:0042773]	1
GO:0050660	protein disulfide isomerase activity [GO:0003756]	1
GO:0016805	dipeptidase activity [GO:0016805]	1
GO:0003824	carbohydrate metabolic process [GO:0005975]	1
GO:0016301	magnesium ion binding [GO:0000287]	1
GO:0004793	cellular amino acid metabolic process [GO:0006520]	1
GO:0004397	histidine ammonia-lyase activity [GO:0004397]	1
GO:0010181	cytoplasm [GO:0005737]	1
GO:0015095	magnesium ion transmembrane transporter activity [GO:0015095]	1
GO:0005363	maltose transmembrane transporter activity [GO:0005363]	1
GO:0004527	DNA repair [GO:0006281]	1
GO:0004359	glutaminase activity [GO:0004359]	1
GO:0015604	organic phosphonate transmembrane transporter activity [GO:0015604]	1
GO:0016833	biosynthetic process [GO:0009058]	1
GO:0016740	protein lipoylation [GO:0009249]	1
GO:0046872	folic acid biosynthetic process [GO:0046656]	1
GO:0047151	methylenetetrahydrofolate-tRNA-(uracil-5-)-methyltransferase (FADH2-oxidizing) activity [GO:0047151]	1
GO:0004367	carbohydrate metabolic process [GO:0005975]	1
GO:0004163	diphosphomevalonate decarboxylase activity [GO:0004163]	1
GO:0030170	glycine biosynthetic process from serine [GO:0019264]	1
GO:0051920	peroxiredoxin activity [GO:0051920]	1
GO:0015204	urea transmembrane transporter activity [GO:0015204]	1
GO:0047810	D-alanine:2-oxoglutarate aminotransferase activity [GO:0047810]	1
GO:0016628	UDP-glucose 6-dehydrogenase activity [GO:0003979]	1
GO:0050518	2-C-methyl-D-erythritol 4-phosphate cytidylyltransferase activity [GO:0050518]	1
GO:0046872	carbon utilization [GO:0015976]	1
GO:0032217	riboflavin transporter activity [GO:0032217]	1
GO:0004003	ATP-dependent DNA helicase activity [GO:0004003]	1
GO:0015299	solute:proton antiporter activity [GO:0015299]	1
GO:0004638	'de novo' IMP biosynthetic process [GO:0006189]	1
GO:0008802	betaine-aldehyde dehydrogenase activity [GO:0008802]	1
GO:0003864	cytoplasm [GO:0005737]	1
GO:0020037	metal ion binding [GO:0046872]	1
GO:0008897	holo-[acyl-carrier-protein] synthase activity [GO:0008897]	1
GO:0004730	RNA binding [GO:0003723]	1
GO:0004815	aspartate-tRNA ligase activity [GO:0004815]	1
GO:0030170	histidine biosynthetic process [GO:0000105]	1
GO:0043023	ribosomal large subunit binding [GO:0043023]	1
GO:0004590	'de novo' UMP biosynthetic process [GO:0044205]	1
GO:0016811	hydrolase activity, acting on carbon-nitrogen (but not peptide) bonds, in linear amides [GO:0016811]	1
GO:0004521	zinc ion binding [GO:0008270]	1
GO:0004479	methionyl-tRNA formyltransferase activity [GO:0004479]	1
GO:0016620	glucose metabolic process [GO:0006006]	1
GO:0015572	integral component of membrane [GO:0016021]	1
GO:0047480	ATP binding [GO:0005524]	1
GO:0015930	glutamate synthase activity [GO:0015930]	1
GO:0046872	ribonuclease III activity [GO:0004525]	1
GO:0052689	carboxylic ester hydrolase activity [GO:0052689]	1
GO:0004088	arginine biosynthetic process [GO:0006526]	1
GO:0015450	cell [GO:0005623]	1
GO:0004146	NADP binding [GO:0050661]	1
GO:0004040	integral component of membrane [GO:0016021]	1
GO:0008782	L-methionine biosynthetic process from methylthioadenosine [GO:0019509]	1
GO:0004827	proline-tRNA ligase activity [GO:0004827]	1
GO:0005524	HslUV protease complex [GO:0009376]	1
GO:0004399	zinc ion binding [GO:0008270]	1
GO:0004527	exonuclease activity [GO:0004527]	1
GO:0016787	'de novo' IMP biosynthetic process [GO:0006189]	1
GO:0004372	pyridoxal phosphate binding [GO:0030170]	1
GO:0016853	cellular aromatic compound metabolic process [GO:0006725]	1
GO:0008534	base-excision repair [GO:0006284]	1
GO:0070402	FMN binding [GO:0010181]	1
GO:0050567	glutaminyl-tRNA synthase (glutamine-hydrolyzing) activity [GO:0050567]	1
GO:0016829	histidine biosynthetic process [GO:0000105]	1
GO:0008911	lactaldehyde dehydrogenase activity [GO:0008911]	1
GO:0004747	D-ribose metabolic process [GO:0006014]	1
GO:0046537	cytoplasm [GO:0005737]	1
GO:0004515	NAD biosynthetic process [GO:0009435]	1
GO:0004139	deoxyribose phosphate catabolic process [GO:0046386]	1
GO:0009486	copper ion binding [GO:0005507]	1
GO:0003872	cytoplasm [GO:0005737]	1
GO:0004575	carbohydrate metabolic process [GO:0005975]	1
GO:0016990	arginine deiminase activity [GO:0016990]	1
GO:0004015	cytoplasm [GO:0005737]	1
GO:0008977	prephenate dehydrogenase activity [GO:0008977]	1
GO:0016755	peptidoglycan biosynthetic process [GO:0009252]	1
GO:0015574	phosphoenolpyruvate-dependent sugar phosphotransferase system [GO:0009401]	1
GO:0004375	glycine decarboxylation via glycine cleavage system [GO:0019464]	1
GO:0003677	deoxyribonuclease activity [GO:0004536]	1
GO:0004832	valine-tRNA ligase activity [GO:0004832]	1
GO:0015087	integral component of membrane [GO:0016021]	1
GO:0009055	protein disulfide oxidoreductase activity [GO:0015035]	1
GO:0016810	hydrolase activity, acting on carbon-nitrogen (but not peptide) bonds [GO:0016810]	1
GO:0000166	nucleoside triphosphate catabolic process [GO:0009143]	1
GO:0047228	plasma membrane [GO:0005886]	1
GO:0016836	hydro-lyase activity [GO:0016836]	1
GO:0008379	cell redox homeostasis [GO:0045454]	1
GO:0004844	base-excision repair [GO:0006284]	1
GO:0046872	RNA processing [GO:0006396]	1
GO:0048029	D-ribose catabolic process [GO:0019303]	1
GO:0004368	glycerol-3-phosphate dehydrogenase complex [GO:0009331]	1
GO:0019829	integral component of membrane [GO:0016021]	1
GO:0022872	phosphoenolpyruvate-dependent sugar phosphotransferase system [GO:0009401]	1
GO:0003700	phosphorelay signal transduction system [GO:0000160]	1
GO:0036381	transferase activity [GO:0016740]	1
GO:0003849	3-deoxy-7-phosphoheptulonate synthase activity [GO:0003849]	1
GO:0050511	regulation of cell shape [GO:0008360]	1
GO:0052655	L-valine transaminase activity [GO:0052655]	1
GO:0008663	2',3'-cyclic-nucleotide 2'-phosphodiesterase activity [GO:0008663]	1
GO:0004525	rRNA processing [GO:0006364]	1
GO:0016740	RNA modification [GO:0009451]	1
GO:0030246	carbon-oxygen lyase activity [GO:0016835]	1
GO:0004594	coenzyme A biosynthetic process [GO:0015937]	1
GO:0043115	precorrin-2 dehydrogenase activity [GO:0043115]	1
GO:0036439	glycerol-3-phosphate biosynthetic process [GO:0046167]	1
GO:0016787	N-acetylglucosamine metabolic process [GO:0006044]	1
GO:0008703	5-amino-6-(5-phosphoribosylamino)uracil reductase activity [GO:0008703]	1
GO:0016787	dUTP metabolic process [GO:0046080]	1
GO:0042282	coenzyme A metabolic process [GO:0015936]	1
GO:0032549	ribonucleoside binding [GO:0032549]	1
GO:0016301	extracellular polysaccharide biosynthetic process [GO:0045226]	1
GO:0004801	pentose-phosphate shunt [GO:0006098]	1
GO:0004519	DNA metabolic process [GO:0006259]	1
GO:0008235	metalloexopeptidase activity [GO:0008235]	1
GO:0004523	nucleic acid binding [GO:0003676]	1
GO:0008270	response to heat [GO:0009408]	1
GO:0004784	superoxide dismutase activity [GO:0004784]	1
GO:0008199	oxidoreductase activity, oxidizing metal ions [GO:0016722]	1
GO:0050661	enoyl-[acyl-carrier-protein] reductase (NADH) activity [GO:0004318]	1
GO:0008483	transaminase activity [GO:0008483]	1
GO:0070040	rRNA (adenine-C2-)-methyltransferase activity [GO:0070040]	1
GO:0015299	potassium ion transport [GO:0006813]	1
GO:0008868	galactitol-1-phosphate 5-dehydrogenase activity [GO:0008868]	1
GO:0004749	ribonucleoside monophosphate biosynthetic process [GO:0009156]	1
GO:0008556	potassium-transporting ATPase activity [GO:0008556]	1
GO:0008808	plasma membrane [GO:0005886]	1
GO:0008720	D-lactate dehydrogenase activity [GO:0008720]	1
GO:0005524	DNA polymerase III complex [GO:0009360]	1
GO:0000179	rRNA (adenine-N6,N6-)-dimethyltransferase activity [GO:0000179]	1
GO:0008940	nitrate reductase complex [GO:0009325]	1
GO:0008270	histidine catabolic process to glutamate and formate [GO:0019557]	1
GO:0005524	metal ion binding [GO:0046872]	1
GO:0046872	heme biosynthetic process [GO:0006783]	1
GO:0004106	chorismate metabolic process [GO:0046417]	1
GO:0004386	nucleotide-excision repair [GO:0006289]	1
GO:0008270	cysteinyl-tRNA aminoacylation [GO:0006423]	1
GO:0004326	tetrahydrofolylpolyglutamate synthase activity [GO:0004326]	1
GO:0003723	metal ion binding [GO:0046872]	1
GO:0005524	phosphoribosylaminoimidazolesuccinocarboxamide synthase activity [GO:0004639]	1
GO:0008855	exodeoxyribonuclease VII activity [GO:0008855]	1
GO:0003924	intrinsic component of plasma membrane [GO:0031226]	1
GO:0008982	transferase activity [GO:0016740]	1
GO:0008965	phosphoenolpyruvate-dependent sugar phosphotransferase system [GO:0009401]	1
GO:0051287	malate dehydrogenase (decarboxylating) (NAD+) activity [GO:0004471]	1
GO:0030145	glycolytic process [GO:0006096]	1
GO:0004177	cytoplasm [GO:0005737]	1
GO:0030976	butanediol metabolic process [GO:0034077]	1
GO:0050660	cell wall organization [GO:0071555]	1
GO:0003840	gamma-glutamyltransferase activity [GO:0003840]	1
GO:0050661	CoA-disulfide reductase activity [GO:0050451]	1
GO:0003723	ribosome [GO:0005840]	1
GO:0043022	rRNA binding [GO:0019843]	1
GO:0030151	electron carrier activity [GO:0009055]	1
GO:0015416	organic phosphonate transmembrane-transporting ATPase activity [GO:0015416]	1
GO:0003700	pathogenesis [GO:0009405]	1
GO:0046872	proteasome core complex [GO:0005839]	1
GO:0009037	transposition, DNA-mediated [GO:0006313]	1
GO:0015098	molybdate ion transmembrane transporter activity [GO:0015098]	1
GO:0008234	cysteine-type peptidase activity [GO:0008234]	1
GO:0003871	5-methyltetrahydropteroyltriglutamate-homocysteine S-methyltransferase activity [GO:0003871]	1
GO:0008270	methionine biosynthetic process [GO:0009086]	1
GO:0008804	arginine metabolic process [GO:0006525]	1
GO:0008270	malonyl-CoA biosynthetic process [GO:2001295]	1
GO:0015577	integral component of membrane [GO:0016021]	1
GO:0016301	guanosine tetraphosphate metabolic process [GO:0015969]	1
GO:0004523	RNA binding [GO:0003723]	1
GO:0003677	alkylbase DNA N-glycosylase activity [GO:0003905]	1
GO:0046872	glycine betaine biosynthetic process from choline [GO:0019285]	1
GO:0008764	ATP binding [GO:0005524]	1
GO:0015129	lactate transmembrane transporter activity [GO:0015129]	1
GO:0016651	ATP synthesis coupled electron transport [GO:0042773]	1
GO:0019206	nucleoside kinase activity [GO:0019206]	1
GO:0004177	aminopeptidase activity [GO:0004177]	1
GO:0008839	cytoplasm [GO:0005737]	1
GO:0000107	lyase activity [GO:0016829]	1
GO:0008745	N-acetylmuramoyl-L-alanine amidase activity [GO:0008745]	1
GO:0016853	carbohydrate metabolic process [GO:0005975]	1
GO:0003887	exonuclease activity [GO:0004527]	1
GO:0046872	phosphogluconate dehydrogenase (decarboxylating) activity [GO:0004616]	1
GO:0030170	biotin biosynthetic process [GO:0009102]	1
GO:0004853	protoporphyrinogen IX biosynthetic process [GO:0006782]	1
GO:0052908	cytoplasm [GO:0005737]	1
GO:0004298	proteolysis involved in cellular protein catabolic process [GO:0051603]	1
GO:0016597	L-phenylalanine biosynthetic process [GO:0009094]	1
GO:0008887	glycerate kinase activity [GO:0008887]	1
GO:0015558	p-aminobenzoyl-glutamate uptake transmembrane transporter activity [GO:0015558]	1
GO:0046872	base-excision repair [GO:0006284]	1
GO:0000287	ribose phosphate diphosphokinase activity [GO:0004749]	1
GO:0005507	integral component of membrane [GO:0016021]	1
GO:0030170	D-amino acid metabolic process [GO:0046416]	1
GO:0003913	DNA photolyase activity [GO:0003913]	1
GO:0003883	'de novo' CTP biosynthetic process [GO:0044210]	1
GO:0003756	cell redox homeostasis [GO:0045454]	1
GO:0052717	zinc ion binding [GO:0008270]	1
GO:0003906	DNA-(apurinic or apyrimidinic site) lyase activity [GO:0003906]	1
GO:0004324	flavin adenine dinucleotide binding [GO:0050660]	1
GO:0030612	arsenate reductase (thioredoxin) activity [GO:0030612]	1
GO:0016597	phosphoglycerate dehydrogenase activity [GO:0004617]	1
GO:0004664	L-phenylalanine biosynthetic process [GO:0009094]	1
GO:0004851	porphyrin-containing compound biosynthetic process [GO:0006779]	1
GO:0008859	RNA binding [GO:0003723]	1
GO:0004019	GTP binding [GO:0005525]	1
GO:0004618	glycolytic process [GO:0006096]	1
GO:0004665	prephenate dehydrogenase (NADP+) activity [GO:0004665]	1
GO:0003677	extrinsic component of plasma membrane [GO:0019897]	1
GO:0015078	proton-transporting ATP synthase complex, coupling factor F(o) [GO:0045263]	1
GO:0008173	RNA binding [GO:0003723]	1
GO:0004152	'de novo' pyrimidine nucleobase biosynthetic process [GO:0006207]	1
GO:0047952	NAD binding [GO:0051287]	1
GO:0051287	3-isopropylmalate dehydrogenase activity [GO:0003862]	1
GO:0003677	ATP-dependent DNA helicase activity [GO:0004003]	1
GO:0030170	isoleucine biosynthetic process [GO:0009097]	1
GO:0036381	pyridoxal 5'-phosphate synthase (glutamine hydrolysing) activity [GO:0036381]	1
GO:0004654	RNA processing [GO:0006396]	1
GO:0004746	riboflavin biosynthetic process [GO:0009231]	1
GO:0004657	proline catabolic process to glutamate [GO:0010133]	1
GO:0004743	pyruvate kinase activity [GO:0004743]	1
GO:0016765	carotenoid biosynthetic process [GO:0016117]	1
GO:0008836	diaminopimelate decarboxylase activity [GO:0008836]	1
GO:0003677	integral component of membrane [GO:0016021]	1
GO:0000287	peptidoglycan biosynthetic process [GO:0009252]	1
GO:0009982	pseudouridylate synthase activity [GO:0004730]	1
GO:0003991	acetylglutamate kinase activity [GO:0003991]	1
GO:0004055	ATP binding [GO:0005524]	1
GO:0008270	rRNA processing [GO:0006364]	1
GO:0008763	ATP binding [GO:0005524]	1
GO:0051287	glycerol-3-phosphate dehydrogenase complex [GO:0009331]	1
GO:0018738	S-formylglutathione hydrolase activity [GO:0018738]	1
GO:0004636	histidine biosynthetic process [GO:0000105]	1
GO:0016740	isoprenoid biosynthetic process [GO:0008299]	1
GO:0050661	homoserine dehydrogenase activity [GO:0004412]	1
GO:0080130	histidinol-phosphate transaminase activity [GO:0004400]	1
GO:0008113	cellular protein modification process [GO:0006464]	1
GO:0016740	pyridoxal phosphate biosynthetic process [GO:0042823]	1
GO:0016831	carboxy-lyase activity [GO:0016831]	1
GO:0016810	carbohydrate metabolic process [GO:0005975]	1
GO:0052654	L-leucine transaminase activity [GO:0052654]	1
GO:0047605	acetoin biosynthetic process [GO:0045151]	1
GO:0015099	metal ion binding [GO:0046872]	1
GO:0009002	serine-type D-Ala-D-Ala carboxypeptidase activity [GO:0009002]	1
GO:0050451	cell [GO:0005623]	1
GO:0004068	aspartate 1-decarboxylase activity [GO:0004068]	1
GO:0003896	DNA helicase activity [GO:0003678]	1
GO:0004418	hydroxymethylbilane synthase activity [GO:0004418]	1
GO:0004421	hydroxymethylglutaryl-CoA synthase activity [GO:0004421]	1
GO:0030976	menaquinone biosynthetic process [GO:0009234]	1
GO:0004640	phosphoribosylanthranilate isomerase activity [GO:0004640]	1
GO:0047129	opine dehydrogenase activity [GO:0047129]	1
GO:0000287	manganese ion binding [GO:0030145]	1
GO:0061603	Mo-molybdopterin cofactor biosynthetic process [GO:0006777]	1
GO:0016597	'de novo' pyrimidine nucleobase biosynthetic process [GO:0006207]	1
GO:0005344	oxygen transporter activity [GO:0005344]	1
GO:0047429	nucleotide binding [GO:0000166]	1
GO:0050515	4-(cytidine 5'-diphospho)-2-C-methyl-D-erythritol kinase activity [GO:0050515]	1
GO:0008959	phosphate acetyltransferase activity [GO:0008959]	1
GO:0004030	aldehyde dehydrogenase [NAD(P)+] activity [GO:0004030]	1
GO:0003922	GMP synthase (glutamine-hydrolyzing) activity [GO:0003922]	1
GO:0005355	integral component of membrane [GO:0016021]	1
GO:0030272	5-formyltetrahydrofolate cyclo-ligase activity [GO:0030272]	1
GO:0008270	DNA repair [GO:0006281]	1
GO:0051287	4-phosphoerythronate dehydrogenase activity [GO:0033711]	1
GO:0015424	ATP binding [GO:0005524]	1
GO:0005524	magnesium ion binding [GO:0000287]	1
GO:0016301	glucose transmembrane transporter activity [GO:0005355]	1
GO:0005524	Holliday junction helicase complex [GO:0009379]	1
GO:0005415	nucleoside:sodium symporter activity [GO:0005415]	1
GO:0050380	response to antibiotic [GO:0046677]	1
GO:0070677	enzyme-directed rRNA 2'-O-methylation [GO:0000453]	1
GO:0004127	ATP binding [GO:0005524]	1
GO:0008686	3,4-dihydroxy-2-butanone-4-phosphate synthase activity [GO:0008686]	1
GO:0004816	asparagine-tRNA ligase activity [GO:0004816]	1
GO:0004129	integral component of membrane [GO:0016021]	1
GO:0015238	antiporter activity [GO:0015297]	1
GO:0030170	transferase activity [GO:0016740]	1
GO:0033817	beta-ketoacyl-acyl-carrier-protein synthase II activity [GO:0033817]	1
GO:0004970	membrane [GO:0016020]	1
GO:0004674	protein serine/threonine kinase activity [GO:0004674]	1
GO:0004471	metal ion binding [GO:0046872]	1
GO:0015450	plasma membrane [GO:0005886]	1
GO:0003723	16S rRNA (adenine(1518)-N(6)/adenine(1519)-N(6))-dimethyltransferase activity [GO:0052908]	1
GO:0008766	UDP-N-acetylmuramoyl-tripeptide-D-alanyl-D-alanine ligase activity [GO:0047480]	1
GO:0016791	phosphatase activity [GO:0016791]	1
GO:0000287	uracil phosphoribosyltransferase activity [GO:0004845]	1
GO:0016765	response to antibiotic [GO:0046677]	1
GO:0004639	'de novo' IMP biosynthetic process [GO:0006189]	1
GO:0016682	electron transport chain [GO:0022900]	1
GO:0016888	endodeoxyribonuclease activity, producing 5'-phosphomonoesters [GO:0016888]	1
GO:0009035	DNA restriction-modification system [GO:0009307]	1
GO:0008998	DNA replication [GO:0006260]	1
GO:0030145	RNA catabolic process [GO:0006401]	1
GO:0004828	selenocysteinyl-tRNA(Sec) biosynthetic process [GO:0097056]	1
GO:0000287	'de novo' AMP biosynthetic process [GO:0044208]	1
GO:0000166	metal ion binding [GO:0046872]	1
GO:0003677	cell [GO:0005623]	1
GO:0008961	phosphatidylglycerol-prolipoprotein diacylglyceryl transferase activity [GO:0008961]	1
GO:0003977	glucosamine-1-phosphate N-acetyltransferase activity [GO:0019134]	1
GO:0004517	nitric oxide biosynthetic process [GO:0006809]	1
GO:0003919	riboflavin kinase activity [GO:0008531]	1
GO:0003684	oxidized purine nucleobase lesion DNA N-glycosylase activity [GO:0008534]	1
GO:0004356	glutamate-ammonia ligase activity [GO:0004356]	1
GO:0043141	ATP-dependent 5'-3' DNA helicase activity [GO:0043141]	1
GO:0003700	DNA-templated transcription, termination [GO:0006353]	1
GO:0008270	RNA processing [GO:0006396]	1
GO:0004076	iron ion binding [GO:0005506]	1
GO:0051991	plasma membrane [GO:0005886]	1
GO:0004527	DNA replication [GO:0006260]	1
GO:0003924	GTP binding [GO:0005525]	1
GO:0016740	biosynthetic process [GO:0009058]	1
GO:0016835	N-acetylmuramic acid catabolic process [GO:0097173]	1
GO:0043801	'de novo' pyrimidine nucleobase biosynthetic process [GO:0006207]	1
GO:0031071	cysteine desulfurase activity [GO:0031071]	1
GO:0004590	carbohydrate metabolic process [GO:0005975]	1
GO:0004794	L-threonine ammonia-lyase activity [GO:0004794]	1
GO:0008270	peptide catabolic process [GO:0043171]	1
GO:0004722	protein serine/threonine phosphatase activity [GO:0004722]	1
GO:0004829	threonine-tRNA ligase activity [GO:0004829]	1
GO:0047451	cytoplasm [GO:0005737]	1
GO:0009007	DNA restriction-modification system [GO:0009307]	1
GO:0046872	molybdenum cofactor guanylyltransferase activity [GO:0061603]	1
GO:0046316	D-gluconate metabolic process [GO:0019521]	1
GO:0003905	DNA binding [GO:0003677]	1
GO:0015293	metal ion transport [GO:0030001]	1
GO:0050661	ferredoxin-NADP+ reductase activity [GO:0004324]	1
GO:0050044	galactose catabolic process [GO:0019388]	1
GO:0003978	lyase activity [GO:0016829]	1
GO:0000166	ribosome [GO:0005840]	1
GO:0004521	endoribonuclease activity [GO:0004521]	1
GO:0002935	response to antibiotic [GO:0046677]	1
GO:0051536	oxidoreductase activity, acting on the CH-NH2 group of donors, NAD or NADP as acceptor [GO:0016639]	1
GO:0003993	cell outer membrane [GO:0009279]	1
GO:0008794	arsenate reductase (glutaredoxin) activity [GO:0008794]	1
GO:0004730	nucleobase catabolic process [GO:0046113]	1
GO:0004003	ATP binding [GO:0005524]	1
GO:0004556	alpha-amylase activity [GO:0004556]	1
GO:0008926	mannitol metabolic process [GO:0019594]	1
GO:0005506	histidine catabolic process to glutamate and formamide [GO:0019556]	1

## Sheet: Cellular Components
GO_Id	GO_Term	Number of ORF
GO:0016021	integral component of membrane [GO:0016021]	236
GO:0005737	cytoplasm [GO:0005737]	46
GO:0005886	plasma membrane [GO:0005886]	36
GO:0005737	ATP binding [GO:0005524]	26
GO:0005576	extracellular region [GO:0005576]	23
GO:0005840	ribosome [GO:0005840]	13
GO:0005622	DNA binding [GO:0003677]	13
GO:0005840	rRNA binding [GO:0019843]	12
GO:0005737	DNA binding [GO:0003677]	11
GO:0005623	cell [GO:0005623]	9
GO:0016021	plasma membrane [GO:0005886]	8
GO:0016021	intracellular [GO:0005622]	6
GO:0016021	amino acid transmembrane transporter activity [GO:0015171]	6
GO:0005622	intracellular [GO:0005622]	5
GO:0005576	cytolysis in other organism [GO:0051715]	5
GO:0016021	ATP binding [GO:0005524]	5
GO:0043190	ATP binding [GO:0005524]	5
GO:0005886	protein-N(PI)-phosphohistidine-sugar phosphotransferase activity [GO:0008982]	5
GO:0005887	integral component of plasma membrane [GO:0005887]	5
GO:0016021	hydrolase activity [GO:0016787]	5
GO:0015934	large ribosomal subunit [GO:0015934]	4
GO:0005737	magnesium ion binding [GO:0000287]	4
GO:0015935	rRNA binding [GO:0019843]	4
GO:0005737	cell wall organization [GO:0071555]	4
GO:0005737	DNA replication [GO:0006260]	3
GO:0005737	NADP binding [GO:0050661]	3
GO:0005737	RNA binding [GO:0003723]	3
GO:0005622	plasma membrane [GO:0005886]	3
GO:0005622	ATP binding [GO:0005524]	3
GO:0009360	DNA binding [GO:0003677]	3
GO:0043190	ATP-binding cassette (ABC) transporter complex [GO:0043190]	3
GO:0005737	cell division [GO:0051301]	3
GO:0005886	arsenite transport [GO:0015700]	3
GO:0016021	arsenite transmembrane transporter activity [GO:0015105]	3
GO:0009317	ATP binding [GO:0005524]	2
GO:0005737	amino acid binding [GO:0016597]	2
GO:0005618	cell wall [GO:0005618]	2
GO:0005737	[formate-C-acetyltransferase]-activating enzyme activity [GO:0043365]	2
GO:0005886	ATP binding [GO:0005524]	2
GO:0005737	L-lactate dehydrogenase activity [GO:0004459]	2
GO:0016021	cation transmembrane transporter activity [GO:0008324]	2
GO:0045261	plasma membrane ATP synthesis coupled proton transport [GO:0042777]	2
GO:0005737	GTP binding [GO:0005525]	2
GO:0016021	ATPase activity, coupled to transmembrane movement of substances [GO:0042626]	2
GO:0005737	chorismate biosynthetic process [GO:0009423]	2
GO:0005886	cytolysis [GO:0019835]	2
GO:0016021	oxidoreductase activity, acting on diphenols and related substances as donors, oxygen as acceptor [GO:0016682]	2
GO:0005737	arginine biosynthetic process [GO:0006526]	2
GO:0005737	zinc ion binding [GO:0008270]	2
GO:0016021	establishment of competence for transformation [GO:0030420]	2
GO:0016020	membrane [GO:0016020]	2
GO:0016021	amino acid transport [GO:0006865]	2
GO:0005886	intracellular protein transmembrane transport [GO:0065002]	2
GO:0009325	nitrate metabolic process [GO:0042126]	2
GO:0016020	CDP-glycerol glycerophosphotransferase activity [GO:0047355]	2
GO:0005727	DNA recombination [GO:0006310]	2
GO:0005737	peptidoglycan biosynthetic process [GO:0009252]	2
GO:0019028	structural molecule activity [GO:0005198]	2
GO:0016021	branched-chain amino acid transmembrane transporter activity [GO:0015658]	2
GO:0045263	plasma membrane ATP synthesis coupled proton transport [GO:0042777]	2
GO:0016021	DNA repair [GO:0006281]	1
GO:0016021	DNA binding [GO:0003677]	1
GO:0016021	type II protein secretion system complex [GO:0015627]	1
GO:0005737	1-(5-phosphoribosyl)-5-[(5-phosphoribosylamino)methylideneamino]imidazole-4-carboxamide isomerase activity [GO:0003949]	1
GO:0005737	cell cycle [GO:0007049]	1
GO:0005737	3-methyl-2-oxobutanoate hydroxymethyltransferase activity [GO:0003864]	1
GO:0005737	phosphoribosylformylglycinamidine synthase activity [GO:0004642]	1
GO:0005618	integral component of membrane [GO:0016021]	1
GO:0005840	RNA binding [GO:0003723]	1
GO:0005737	hydrolase activity [GO:0016787]	1
GO:0016021	drug transmembrane transporter activity [GO:0015238]	1
GO:0005576	integral component of membrane [GO:0016021]	1
GO:0005737	polyribonucleotide nucleotidyltransferase activity [GO:0004654]	1
GO:0005886	lipoprotein biosynthetic process [GO:0042158]	1
GO:0005737	S-adenosylmethionine-dependent methyltransferase activity [GO:0008757]	1
GO:0016021	glutamate biosynthetic process [GO:0006537]	1
GO:0016021	flavin adenine dinucleotide binding [GO:0050660]	1
GO:0016021	citrate transmembrane transporter activity [GO:0015137]	1
GO:0016021	cytochrome-c oxidase activity [GO:0004129]	1
GO:0005737	4 iron, 4 sulfur cluster binding [GO:0051539]	1
GO:0009376	ATPase activity [GO:0016887]	1
GO:0045261	proton-transporting ATPase activity, rotational mechanism [GO:0046961]	1
GO:0005737	endonuclease activity [GO:0004519]	1
GO:0016020	ionotropic glutamate receptor activity [GO:0004970]	1
GO:0005737	excinuclease ABC activity [GO:0009381]	1
GO:0005737	pantothenate kinase activity [GO:0004594]	1
GO:0005737	transcription factor activity, sequence-specific DNA binding [GO:0003700]	1
GO:0005737	pyridoxal phosphate binding [GO:0030170]	1
GO:0016021	peptidoglycan-based cell wall [GO:0009274]	1
GO:0045239	tricarboxylic acid cycle [GO:0006099]	1
GO:0015627	protein secretion by the type II secretion system [GO:0015628]	1
GO:0032153	integral component of plasma membrane [GO:0005887]	1
GO:0005737	exoribonuclease II activity [GO:0008859]	1
GO:0005737	'de novo' CTP biosynthetic process [GO:0044210]	1
GO:0005737	4-hydroxy-tetrahydrodipicolinate synthase [GO:0008840]	1
GO:0005737	ferric iron binding [GO:0008199]	1
GO:0016021	transferase activity [GO:0016740]	1
GO:0005886	cardiolipin biosynthetic process [GO:0032049]	1
GO:0005840	protein methyltransferase activity [GO:0008276]	1
GO:0005840	structural constituent of ribosome [GO:0003735]	1
GO:0005940	barrier septum assembly [GO:0000917]	1
GO:0005886	iron ion homeostasis [GO:0055072]	1
GO:0016021	organelle inner membrane [GO:0019866]	1
GO:0020002	integral component of membrane [GO:0016021]	1
GO:0009331	glycerol-3-phosphate catabolic process [GO:0046168]	1
GO:0016021	amidase activity [GO:0004040]	1
GO:0005694	DNA binding [GO:0003677]	1
GO:0005737	dihydroorotate dehydrogenase activity [GO:0004152]	1
GO:0005737	iron ion binding [GO:0005506]	1
GO:0005737	FtsZ-dependent cytokinesis [GO:0043093]	1
GO:0005737	aminoacyl-tRNA hydrolase activity [GO:0004045]	1
GO:0005737	5,10-methylenetetrahydrofolate-dependent tRNA (m5U54) methyltransferase activity [GO:0030698]	1
GO:0016021	peroxidase activity [GO:0004601]	1
GO:0005737	exodeoxyribonuclease VII complex [GO:0009318]	1
GO:0005737	pantetheine-phosphate adenylyltransferase activity [GO:0004595]	1
GO:0005886	dephosphorylation [GO:0016311]	1
GO:0005737	DNA recombination [GO:0006310]	1
GO:0016021	oxidoreductase activity, acting on NAD(P)H [GO:0016651]	1
GO:0019008	Mo-molybdopterin cofactor biosynthetic process [GO:0006777]	1
GO:0005737	AMP salvage [GO:0044209]	1
GO:0009279	acid phosphatase activity [GO:0003993]	1
GO:0005737	cellular phosphate ion homeostasis [GO:0030643]	1
GO:0016021	cell adhesion [GO:0007155]	1
GO:0005886	symporter activity [GO:0015293]	1
GO:0016021	NAD binding [GO:0051287]	1
GO:0005737	adenyl-nucleotide exchange factor activity [GO:0000774]	1
GO:0005886	peptidyl-prolyl cis-trans isomerase activity [GO:0003755]	1
GO:0005737	sedoheptulose-7-phosphate:D-glyceraldehyde-3-phosphate glyceronetransferase activity [GO:0004801]	1
GO:0005737	metal ion binding [GO:0046872]	1
GO:0005886	protein-N(PI)-phosphohistidine-lactose phosphotransferase system transporter activity [GO:0022869]	1
GO:1990077	magnesium ion binding [GO:0000287]	1
GO:0015935	small ribosomal subunit [GO:0015935]	1
GO:0016021	sugar efflux transmembrane transporter activity [GO:0015542]	1
GO:0045263	ATP synthesis coupled proton transport [GO:0015986]	1
GO:0005623	DNA binding [GO:0003677]	1
GO:0005886	protein-N(PI)-phosphohistidine-mannitol phosphotransferase system transmembrane transporter activity [GO:0022872]	1
GO:0009318	DNA catabolic process [GO:0006308]	1
GO:0005737	kinase activity [GO:0016301]	1
GO:0009317	acetyl-CoA carboxylase activity [GO:0003989]	1
GO:0005737	sucrose alpha-glucosidase activity [GO:0004575]	1
GO:0009376	HslUV protease complex [GO:0009376]	1
GO:1902560	GMP reductase activity [GO:0003920]	1
GO:0005737	beta-ketoacyl-acyl-carrier-protein synthase III activity [GO:0033818]	1
GO:0016021	ATPase activity [GO:0016887]	1
GO:0005960	glycine cleavage complex [GO:0005960]	1
GO:0005737	xanthine phosphoribosyltransferase activity [GO:0000310]	1
GO:0005737	cytidylate kinase activity [GO:0004127]	1
GO:0005737	DNA unwinding involved in DNA replication [GO:0006268]	1
GO:0016021	ferrous iron transmembrane transporter activity [GO:0015093]	1
GO:0005886	'de novo' UMP biosynthetic process [GO:0044205]	1
GO:0005615	extracellular space [GO:0005615]	1
GO:0005737	intramolecular lyase activity [GO:0016872]	1
GO:0005737	N-acetylneuraminate catabolic process [GO:0019262]	1
GO:0005886	lipoteichoic acid biosynthetic process [GO:0070395]	1
GO:0005737	NAD metabolic process [GO:0019674]	1
GO:0005886	P-P-bond-hydrolysis-driven protein transmembrane transporter activity [GO:0015450]	1
GO:0005737	uracil DNA N-glycosylase activity [GO:0004844]	1
GO:0005737	D-alanine-poly(phosphoribitol) ligase activity [GO:0047473]	1
GO:0005737	deoxyribose-phosphate aldolase activity [GO:0004139]	1
GO:0005886	proton-transporting ATP synthase complex, catalytic core F(1) [GO:0045261]	1
GO:0005887	inorganic anion transmembrane transporter activity [GO:0015103]	1
GO:0005694	DNA topoisomerase type II (ATP-hydrolyzing) activity [GO:0003918]	1
GO:0005886	cation transmembrane transporter activity [GO:0008324]	1
GO:0016021	P-P-bond-hydrolysis-driven protein transmembrane transporter activity [GO:0015450]	1
GO:0005737	phosphoribosylformylglycinamidine cyclo-ligase activity [GO:0004641]	1
GO:0005737	3-hydroxyoctanoyl-[acyl-carrier-protein] dehydratase activity [GO:0047451]	1
GO:0045261	ATP hydrolysis coupled proton transport [GO:0015991]	1
GO:0016021	hydrogen ion transmembrane transporter activity [GO:0015078]	1
GO:0005886	septin ring [GO:0005940]	1
GO:0016021	cell division [GO:0051301]	1
GO:0016021	glycerophosphodiester phosphodiesterase activity [GO:0008889]	1
GO:0005737	alanine biosynthetic process [GO:0006523]	1
GO:0005737	DNA replication initiation [GO:0006270]	1
GO:0005737	RNA-DNA hybrid ribonuclease activity [GO:0004523]	1
GO:0005623	flavin adenine dinucleotide binding [GO:0050660]	1
GO:0005886	magnesium ion transport [GO:0015693]	1
GO:0005886	lipid glycosylation [GO:0030259]	1
GO:0005737	arginyl-tRNA aminoacylation [GO:0006420]	1
GO:0005737	CTP biosynthetic process [GO:0006241]	1
GO:0009325	nitrate reductase activity [GO:0008940]	1
GO:0016021	alanine:sodium symporter activity [GO:0015655]	1
GO:0005737	nucleic acid binding [GO:0003676]	1
GO:0005737	barrier septum assembly [GO:0000917]	1
GO:0005737	cell morphogenesis [GO:0000902]	1
GO:0009316	3-isopropylmalate dehydratase activity [GO:0003861]	1
GO:0019897	DNA topological change [GO:0006265]	1
GO:0009274	heme transport [GO:0015886]	1
GO:0005737	shikimate kinase activity [GO:0004765]	1
GO:0005886	biotin transporter activity [GO:0015225]	1
GO:0009380	nucleotide-excision repair [GO:0006289]	1
GO:0005829	cysteine-type peptidase activity [GO:0008234]	1
GO:0005623	electron carrier activity [GO:0009055]	1
GO:0005623	integral component of membrane [GO:0016021]	1
GO:0005737	ACP phosphopantetheine attachment site binding involved in fatty acid biosynthetic process [GO:0000036]	1
GO:0005623	monovalent inorganic cation transmembrane transporter activity [GO:0015077]	1
GO:0005737	arginine biosynthetic process via ornithine [GO:0042450]	1
GO:0016021	ATP synthesis coupled electron transport [GO:0042773]	1
GO:0005886	ATP hydrolysis coupled proton transport [GO:0015991]	1
GO:0005886	protoheme IX farnesyltransferase activity [GO:0008495]	1
GO:0005887	inorganic phosphate transmembrane transporter activity [GO:0005315]	1
GO:0005886	nucleotide binding [GO:0000166]	1
GO:0005737	plasma membrane [GO:0005886]	1
GO:0016021	galactitol transmembrane transporter activity [GO:0015577]	1
GO:0005737	2,3-bisphosphoglycerate-independent phosphoglycerate mutase activity [GO:0046537]	1
GO:0005886	ATPase activity, coupled to transmembrane movement of substances [GO:0042626]	1
GO:0032300	mismatched DNA binding [GO:0030983]	1
GO:0016021	undecaprenyl-diphosphatase activity [GO:0050380]	1
GO:0019866	kinase activity [GO:0016301]	1
GO:0009331	glycerol-3-phosphate dehydrogenase activity [GO:0004368]	1
GO:0005737	aminopeptidase activity [GO:0004177]	1
GO:0031226	SRP-dependent cotranslational protein targeting to membrane [GO:0006614]	1
GO:0005727	DNA replication initiation [GO:0006270]	1
GO:0005694	magnesium ion binding [GO:0000287]	1
GO:0005829	ATP binding [GO:0005524]	1
GO:0016021	cysteine-type peptidase activity [GO:0008234]	1
GO:0005887	FtsZ-dependent cytokinesis [GO:0043093]	1
GO:0005886	nickel cation transmembrane transporter activity [GO:0015099]	1
GO:0005886	intracellular protein transport [GO:0006886]	1
GO:0005886	phosphorelay sensor kinase activity [GO:0000155]	1
GO:0005886	protein-N(PI)-phosphohistidine-fructose phosphotransferase system transporter activity [GO:0022877]	1
GO:0005737	integral component of membrane [GO:0016021]	1
GO:0005737	GTPase activity [GO:0003924]	1
GO:0005839	metal ion binding [GO:0046872]	1
GO:0016021	hemolysis by symbiont of host erythrocytes [GO:0019836]	1
GO:0005737	carbohydrate derivative biosynthetic process [GO:1901137]	1
GO:0016021	cytochrome complex assembly [GO:0017004]	1
GO:0016020	heme transport [GO:0015886]	1
GO:0005737	arginine catabolic process to ornithine [GO:0019547]	1
GO:0005737	isopentenyl-diphosphate delta-isomerase activity [GO:0004452]	1
GO:0009379	DNA recombination [GO:0006310]	1
