# Supplementary material for: Whole genome sequence analysis of multi drug resistant community associated methicillin resistant Staphylococcus aureus from food fish: detection of clonal lineage ST 28 and its antimicrobial resistance and virulence genes
Source: PeerJ journal article supplement (doi:10.7717/peerj.11224), 2021-05-24
Supplement: Supplementary_Tables.pdf [file Supplementary_Tables.pdf]

**Table S1:****Whole Genome Sequence Project information**

| <b>Description</b>                   | <b>Value</b>                   |
|--------------------------------------|--------------------------------|
| Finishing quality                    | Draft genome                   |
| Library used                         | 2x 250 bp                      |
| Sequencing platforms                 | Illumina HiSeq 2500            |
| Library type                         | Paired End                     |
| Project type                         | <i>De novo</i> genome assembly |
| Assembly method                      | MaSuRCA                        |
| Total number of paired-end Raw Reads | 7,237,547                      |
| Genome coverage                      | 544.0x                         |
| Total number of bases (Mb)           | 1447.5                         |
| GC content                           | 35.11                          |
| Max Read Length                      | 100                            |
| Min Read Length                      | 100                            |
| High Quality data- No. of Reads      | 7,731,542                      |
| Total number of bases                | 731,267,948                    |
| Max Read Length                      | 100                            |
| Min Read Length                      | 95                             |
| GenBank ID                           | NBZX000000000.1                |
| BioProject                           | PRJNA352109                    |
| BioSample                            | SAMN05967212                   |
| Source                               | Dried Ribbonfish               |

**Table S2:****Nucleotide and gene contents levels of MRSA7 genome assembled *de novo* by MaSuRCA**

| <b>Description</b>                                                        | <b>Value</b>       |
|---------------------------------------------------------------------------|--------------------|
| Total Genome Length (bp)                                                  | 2,851,163 (~2.8Mb) |
| No. of contigs                                                            | 120                |
| N50 length Scaffold (bp)                                                  | 66,022             |
| Average Scaffold length (bp)                                              | 23759.70           |
| Largest Scaffold (bp)                                                     | 170965             |
| Smallest Scaffold (bp)                                                    | 301                |
| Number of predicted gene                                                  | 2797               |
| Number of predicted CDs with significant BLASTX match                     | 2755 (98.49)       |
| Number of predicted CDs with UniProt annotation                           | 1741 (62.24)       |
| Number of CDS with no significant BLASTX hit                              | 40                 |
| Number of CDS with a significant BLASTX hit but no UniProt<br>Information | 1014               |
| Average Gene Size                                                         | 902                |
| Longest Gene                                                              | 30258              |
| Shortest Gene                                                             | 72                 |
| tRNA genes                                                                | 80                 |

**Supplementary Table S3: Pathways Analysis of the Genes**

| <b>Pathways</b>                                     | <b>Number of genes</b> | <b>Number of Enzymes</b> |
|-----------------------------------------------------|------------------------|--------------------------|
| Purine metabolism                                   | 168                    | 44                       |
| Biosynthesis of antibiotics                         | 14                     | 132                      |
| Thiamine metabolism                                 | 118                    | 9                        |
| Pyrimidine metabolism                               | 33                     | 23                       |
| Pyruvate metabolism                                 | 32                     | 29                       |
| Glycine, serine and threonine metabolism            | 28                     | 23                       |
| Glycolysis / Gluconeogenesis                        | 28                     | 23                       |
| Cysteine and methionine metabolism                  | 26                     | 22                       |
| Arginine biosynthesis                               | 24                     | 17                       |
| Amino sugar and nucleotide sugar metabolism         | 22                     | 19                       |
| Aminoacyl-tRNA                                      | 21                     | 17                       |
| Carbon fixation in photosynthetic organisms         | 16                     | 13                       |
| Alanine, aspartate and glutamate metabolism         | 21                     | 16                       |
| Propanoate metabolism                               | 21                     | 15                       |
| Pantothenate and CoA biosynthesis                   | 18                     | 15                       |
| Carbon fixation pathways in prokaryotes 17 16       | 17                     | 16                       |
| Drug metabolism - other enzymes                     | 17                     | 7                        |
| Galactose metabolism                                | 16                     | 14                       |
| Aminobenzoate degradation                           | 16                     | 3                        |
| Phenylalanine, tyrosine and tryptophan biosynthesis | 19                     | 19                       |
| Methane metabolism                                  | 16                     | 13                       |
| Carbon fixation in photosynthetic organisms         | 16                     | 13                       |
| Pentose phosphate pathway                           | 16                     | 15                       |

|                                             |    |    |
|---------------------------------------------|----|----|
| Citrate cycle (TCA cycle)                   | 16 | 14 |
| Arginine and proline metabolism             | 15 | 11 |
| Terpenoid backbone biosynthesis             | 15 | 15 |
| Butanoate metabolism                        | 15 | 13 |
| Lysine biosynthesis                         | 14 | 11 |
| Valine, leucine and isoleucine degradation  | 13 | 10 |
| Histidine metabolism                        | 13 | 12 |
| Fructose and mannose metabolism             | 13 | 10 |
| Nicotinate and nicotinamide metabolism      | 13 | 9  |
| Nitrogen metabolism                         | 13 | 9  |
| Glyoxylate and dicarboxylate metabolism     | 12 | 13 |
| Glutathione metabolism                      | 12 | 7  |
| Valine, leucine and isoleucine biosynthesis | 12 | 8  |
| Folate biosynthesis                         | 12 | 12 |
| Fatty acid biosynthesis                     | 12 | 10 |

Enzyme Classification (EC) assignment was obtained using BLAST2GO functional class and orthologous assessment. Mapping of genes to the biological pathways were performed using BLAST2GO pro server. A total of 587 genes were mapped on different pathways out of which majority of the genes were falling in to the purine metabolism (168), Biosynthesis of antibiotics (145), and Thiamine metabolism (118)
